# Supplementary material for: Metal-free synthesis of cyano acrylates via cyanuric chloride-mediated three-component reactions involving a cascade consists of Knoevenagel condensation/cyano hydration/esterification
Source: Royal Society of Chemistry journal article supplement (doi:10.1039/c4ra13826k), 2014-01-01

**Metal-free synthesis of cyano acrylates via cyanuric chloride-mediated  
three-component reactions involving a cascade consists of Knoevenagel  
condensation/cyano hydration/esterification**

Jie-Ping Wan,<sup>\*,a</sup> Yanfeng Jing,<sup>a</sup> Yunyun Liu<sup>a</sup> and Shouri Sheng<sup>\*,a</sup>

<sup>a</sup>Key Laboratory of Functional Small Organic Molecules, Ministry of Education, College of Chemistry and Chemical Engineering, Jiangxi Normal University, Nanchang 330022, P. R. China.

E-mail: wanjieping@gmail.com; shengsr@jxnu.edu.cn

## Contents

|                                                             |         |
|-------------------------------------------------------------|---------|
| General information.....                                    | S1      |
| Characterization data.....                                  | S2-S9   |
| <sup>1</sup> H and <sup>13</sup> C NMR of all products..... | S10-S37 |

### General information

All chemicals used in the experiments were obtained from commercial resource and used without further purification. Solvents used as eluent in the chromatography were distilled prior to use. The <sup>1</sup>H and <sup>13</sup>C NMR were recorded in 400 MHz apparatus using CDCl<sub>3</sub>, chemical shifts were reported in ppm relative to the CDCl<sub>3</sub> as internal standard. HMRS were tested under ESI model in a spectrometer equipped with TOF analyzer. And melting points were analyzed in an X-4A apparatus without temperature correction.

## Characterization data

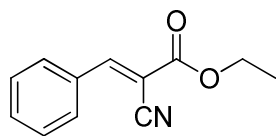

**Ethyl 2-cyano-3-phenylacrylate (6a).**<sup>1,2</sup> <sup>1</sup>H NMR (400 MHz, CDCl<sub>3</sub>):  $\delta$  = 8.26 (s, 1 H), 8.00 (d,  $J$  = 7.2 Hz, 2 H), 7.59-7.49 (m, 3 H), 4.40 (q,  $J$  = 7.2 Hz, 2 H), 1.41 (t,  $J$  = 7.2 Hz, 3 H); <sup>13</sup>C NMR (100 MHz, CDCl<sub>3</sub>):  $\delta$  = 162.5, 155.1, 133.4, 131.5, 131.1, 130.1, 115.5, 103.0, 62.8, 14.2.

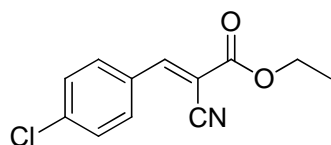

**Ethyl 3-(4-chlorophenyl)-2-cyanoacrylate (6b).**<sup>1,2</sup> <sup>1</sup>H NMR (400 MHz, CDCl<sub>3</sub>):  $\delta$  = 8.20 (s, 1 H), 7.93 (d, 2 H,  $J$  = 8.0 Hz), 7.48 (d,  $J$  = 8.4 Hz, 2 H), 4.29 (q,  $J$  = 7.2 Hz, 2 H), 1.40 (t,  $J$  = 7.2 Hz, 3 H); <sup>13</sup>C NMR (100 MHz, CDCl<sub>3</sub>):  $\delta$  = 162.2, 153.3, 139.6, 132.2, 129.9, 129.6, 115.2, 103.6, 62.8, 14.1.

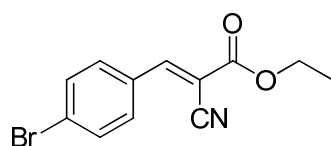

**Ethyl 3-(4-bromophenyl)-2-cyanoacrylate (6c).**<sup>3</sup> <sup>1</sup>H NMR (400 MHz, CDCl<sub>3</sub>):  $\delta$  = 8.18 (s, 1 H), 7.85 (d,  $J$  = 7.6 Hz, 2 H), 7.64 (d,  $J$  = 8.4 Hz, 2 H), 4.39 (q,  $J$  = 7.2 Hz, 2 H), 1.40 (t,  $J$  = 7.2 Hz, 3 H); <sup>13</sup>C NMR (100 MHz, CDCl<sub>3</sub>):  $\delta$  = 162.2, 153.5, 132.7, 132.2, 130.3, 128.2, 115.2, 103.7, 62.9, 14.1.

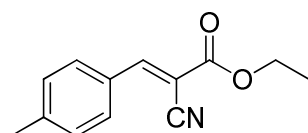

**Ethyl 2-cyano-3-p-tolylacrylate (6d).**<sup>1,2</sup> <sup>1</sup>H NMR (400 MHz, CDCl<sub>3</sub>):  $\delta$  = 8.20 (s, 1 H), 7.88 (d,  $J$  = 8.0 Hz, 2 H), 7.28 (d,  $J$  = 8.0 Hz, 2 H), 4.37 (q,  $J$  = 7.2 Hz, 2 H), 2.42 (s, 3 H), 1.38 (t,  $J$  = 7.2 Hz, 3 H); <sup>13</sup>C NMR (100 MHz, CDCl<sub>3</sub>):  $\delta$  = 162.2, 154.4, 144.1, 130.7, 129.5, 128.4, 115.2, 101.1, 62.0, 21.3, 13.6.

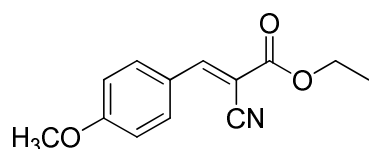

**Ethyl 2-cyano-3-(4-methoxyphenyl)acrylate (6e).**<sup>1,2</sup> <sup>1</sup>H NMR (400 MHz, CDCl<sub>3</sub>):  $\delta$  = 8.15 (s, 1 H), 7.98 (d,  $J$  = 8.8 Hz, 2 H) 6.97 (d,  $J$  = 8.8 Hz, 2 H), 4.35 (q,  $J$  = 7.2 Hz, 2 H), 3.88 (s, 3 H), 1.38 (t,  $J$  = 7.2 Hz, 3 H); <sup>13</sup>C NMR (100 MHz, CDCl<sub>3</sub>):  $\delta$  = 163.8, 163.1, 154.4, 133.6, 124.4, 116.2, 114.8, 99.4, 62.4, 55.6, 14.2.

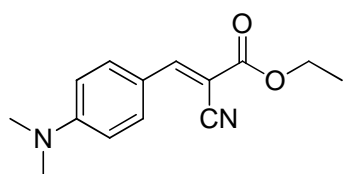

**Ethyl 2-cyano-3-(4-(dimethylamino)phenyl)acrylate (6f).**<sup>4</sup> <sup>1</sup>H NMR (400 MHz, CDCl<sub>3</sub>):  $\delta$  = 8.05 (s, 1 H), 7.92 (d,  $J$  = 8.4 Hz, 2 H), 6.68 (t,  $J$  = 8.4 Hz, 2 H), 4.33 (q,  $J$  = 6.8 Hz, 2 H), 3.10 (s, 6 H), 1.37 (t,  $J$  = 6.8 Hz, 3 H); <sup>13</sup>C NMR (100 MHz, CDCl<sub>3</sub>):  $\delta$  = 164.4, 154.4, 153.6, 134.0, 119.3, 117.5, 111.5, 93.8, 61.8, 39.9, 14.3.

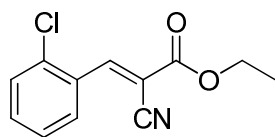

**Ethyl 3-(2-chlorophenyl)-2-cyanoacrylate (6g).**<sup>4</sup> <sup>1</sup>H NMR (400 MHz, CDCl<sub>3</sub>):  $\delta$  = 8.69 (s, 1 H), 8.24-8.22 (m, 1 H), 7.52-7.41 (m, 3 H), 4.43 (q,  $J$  = 6.8 Hz, 2 H), 1.41 (t,  $J$  = 7.2 Hz, 3 H); <sup>13</sup>C NMR (100 MHz, CDCl<sub>3</sub>):  $\delta$  = 161.8, 151.3, 136.4, 133.7, 130.4, 129.9, 127.5, 114.8, 106.1, 63.00, 14.0.

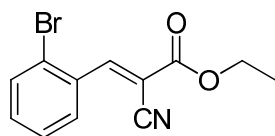

**Ethyl 3-(2-bromophenyl)-2-cyanoacrylate (6h).** Pale yellow solid, m.p. 68-70 °C; <sup>1</sup>H NMR (400 MHz, CDCl<sub>3</sub>):  $\delta$  = 8.64 (s, 1 H), 8.17 (d,  $J$  = 7.6 Hz, 1 H) 7.71 (d,  $J$  = 8.0 Hz, 1 H), 7.46 (t,  $J$  = 7.6 Hz, 1 H), 7.39 (t,  $J$  = 7.6 Hz, 1 H), 4.42 (q,  $J$  = 7.2 Hz, 2 H), 1.42 (t,  $J$  = 7.2 Hz, 3 H); <sup>13</sup>C NMR (100 MHz, CDCl<sub>3</sub>):  $\delta$  = 161.7, 153.8, 133.6, 131.7, 130.1, 128.0, 126.5, 114.6, 62.9, 14.1. ESI-HRMS Calcd for C<sub>12</sub>H<sub>11</sub>BrNO<sub>2</sub> [M + H]<sup>+</sup>, 279.9968; found, 279.9960.

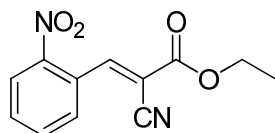

**Ethyl 2-cyano-3-(2-nitrophenyl)acrylate (6i).**<sup>5</sup> <sup>1</sup>H NMR (400 MHz, CDCl<sub>3</sub>):  $\delta$  = 8.72 (s, 1 H), 8.29 (d,  $J$  = 8.4 Hz, 1 H), 7.78-7.73 (m, 2 H), 7.28 (m, 1 H), 4.45-4.40 (m, 2 H), 1.42 (t,  $J$  = 7.2 Hz, 3 H); <sup>13</sup>C NMR (100 MHz, CDCl<sub>3</sub>):  $\delta$  = 161.0, 152.9, 147.4, 134.4, 132.2, 130.6, 128.1, 125.4, 113.8, 108.7, 63.1, 14.01.

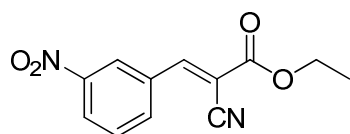

**Ethyl 2-cyano-3-(3-nitrophenyl)acrylate (6j).**<sup>4</sup> <sup>1</sup>H NMR (400 MHz, CDCl<sub>3</sub>):  $\delta$  = 8.71(s, 1 H), 8.43-8.40 (m, 2 H), 8.32 (s, 1 H), 7.75 (t, 1 H,  $J$  = 8.0 Hz), 4.44 (q, 2 H,  $J$  = 7.2 Hz), 1.42 (t,  $J$  = 7.2 Hz, 3H); <sup>13</sup>C NMR (100 MHz, CDCl<sub>3</sub>):  $\delta$  = 160.9, 151.2, 148.2, 134.6, 132.5, 130.0, 126.4, 125.3, 113.9, 106.3, 62.7, 13.5.

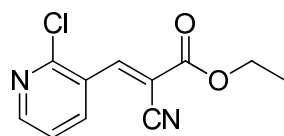

**Ethyl 3-(2-chloropyridin-3-yl)-2-cyanoacrylate (6k).** White solid, m.p. 68-69 °C; <sup>1</sup>H NMR (400 MHz, CDCl<sub>3</sub>):  $\delta$  = 8.60 (s, 1 H), 8.54 (d,  $J$  = 6.4 Hz, 2 H), 7.44 (t,  $J$  = 6.4 Hz, 1 H), 4.43 (q,  $J$  = 6.8 Hz, 2 H), 1.43 (t,  $J$  = 6.8 Hz, 3 H); <sup>13</sup>C NMR (100 MHz, CDCl<sub>3</sub>):  $\delta$  = 160.6, 152.0, 151.8, 148.9, 137.7, 126.3, 122.4, 113.7, 107.9, 62.7, 13.6; ESI-HRMS Calcd for C<sub>11</sub>H<sub>10</sub>ClN<sub>2</sub>O<sub>2</sub> [M+H]<sup>+</sup>, 237.0425; found, 237.0418.

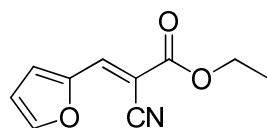

**Ethyl 2-cyano-3-(furan-2-yl)acrylate (6l).**<sup>4</sup> <sup>1</sup>H NMR (400 MHz, CDCl<sub>3</sub>):  $\delta$  = 8.02 (s, 1 H), 7.75 (d,  $J$  = 8.4 Hz, 1 H), 7.40 (s, 1H), 6.64 (s, 1 H), 4.39-4.344 (q,  $J$  = 6.8 Hz, 2 H), 1.38 (t,  $J$  = 7.2 Hz, 3 H); <sup>13</sup>C NMR (100 MHz, CDCl<sub>3</sub>):  $\delta$  = 162.5, 148.8, 148.2, 139.4, 121.6, 115.2, 113.8, 98.7, 62.5, 14.1.

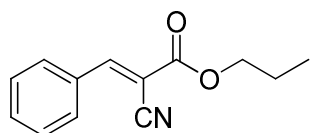

**Propyl 2-cyano-3-phenylacrylate (6m).** White solid, m.p. 48-50 °C;  $^1\text{H}$  NMR (400 MHz,  $\text{CDCl}_3$ ),  $\delta = 8.24$  (s, 1 H), 7.98 (d,  $J = 8.0$  Hz, 2 H), 7.55-7.47 (m, 3 H), 4.29 (t,  $J = 6.4$  Hz, 2 H), 1.82-1.76 (m, 2 H), 1.02 (t,  $J = 7.2$  Hz, 3 H);  $^{13}\text{C}$  NMR (100 MHz,  $\text{CDCl}_3$ ):  $\delta = 162.5, 154.9, 133.2, 131.5, 131.0, 129.2, 115.4, 103.0, 68.1, 21.9, 10.3$ ; ESI-HRMS Calcd for  $\text{C}_{13}\text{H}_{14}\text{NO}_2$   $[\text{M}+\text{H}]^+$ , 216.1019; found, 216.1024.

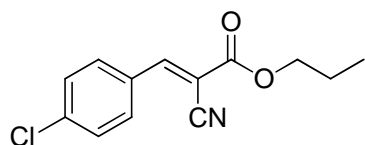

**Propyl 3-(4-chlorophenyl)-2-cyanoacrylate (6n).** White solid, m.p. 81-83 °C;  $^1\text{H}$  NMR (400 MHz,  $\text{CDCl}_3$ ):  $\delta = 8.12$  (s, 1 H), 7.86 (d,  $J = 8.4$  Hz, 2 H), 7.40 (d,  $J = 8.4$  Hz, 2 H), 4.21 (t,  $J = 6.8$  Hz, 2 H), 1.76-1.63 (m, 2 H), 0.95 (t,  $J = 7.2$  Hz, 3 H);  $^{13}\text{C}$  NMR (100 MHz,  $\text{CDCl}_3$ ):  $\delta = 162.3, 153.3, 139.6, 132.2, 129.9, 129.7, 115.2, 103.6, 68.3, 21.9, 10.3$ ; ESI-HRMS Calcd for  $\text{C}_{13}\text{H}_{13}\text{ClNO}_2$   $[\text{M}+\text{H}]^+$ , 250.0629; found, 250.0628.

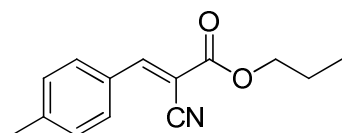

**Propyl 2-cyano-3-p-tolylacrylate (6o).** Colorless liquid;  $^1\text{H}$  NMR (400 MHz,  $\text{CDCl}_3$ ):  $\delta = 8.20$  (s, 1 H), 7.89 (d,  $J = 8.0$  Hz, 2 H), 7.30 (d,  $J = 8.0$  Hz, 2 H), 4.27 (t,  $J = 6.4$  Hz, 2 H), 2.43 (s, 3 H), 1.82-1.76 (m, 2 H), 1.02 (t,  $J = 7.2$  Hz, 3 H);  $^{13}\text{C}$  NMR (100 MHz,  $\text{CDCl}_3$ ):  $\delta = 162.80, 154.9, 144.6, 131.2, 130.0, 128.9, 115.7, 101.6, 68.0, 21.9, 21.8, 10.2$ ; ESI-HRMS Calcd for  $\text{C}_{14}\text{H}_{16}\text{NO}_2$   $[\text{M}+\text{H}]^+$ , 230.1176; found, 230.1169.

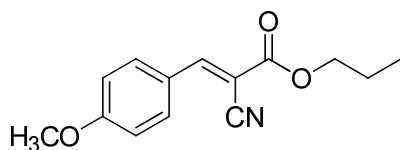

**Propyl 2-cyano-3-(4-methoxyphenyl)acrylate (6p).** Yellow liquid;  $^1\text{H}$  NMR (400

MHz,  $\text{CDCl}_3$ ),  $\delta = 8.15$  (s, 1 H), 7.99 (d,  $J = 8.8$  Hz, 2 H) 6.98 (d,  $J = 8.8$  Hz, 2 H), 4.26 (t,  $J = 6.8$  Hz, 2 H), 3.89 (s, 3H), 1.80-1.75 (m, 2 H), 1.02 (t,  $J = 7.2$  Hz, 3 H);  $^{13}\text{C}$  NMR (100 MHz,  $\text{CDCl}_3$ )  $\delta = 163.8, 163.1, 154.2, 133.6, 124.4, 116.1, 114.8, 99.4, 67.8, 55.6, 21.9, 10.3$ ; ESI-HRMS Calcd for  $\text{C}_{14}\text{H}_{16}\text{NO}_3[\text{M}+\text{H}]^+$ , 246.1125; found, 246.1120.

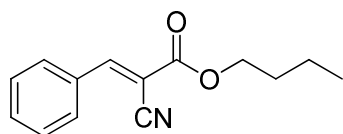

**Butyl 2-cyano-3-phenylacrylate (6q).** White solid, m.p. 107-109 °C;  $^1\text{H}$  NMR (400 MHz,  $\text{CDCl}_3$ ):  $\delta = 8.25$  (s, 1 H), 7.99 (d,  $J = 8.4$  Hz, 2 H), 7.56-7.48 (m, 3 H), 4.34 (t,  $J = 6.8$  Hz, 2 H), 1.77-1.72 (m, 2 H), 1.50-1.44 (m, 2 H), 0.98 (t,  $J = 7.6$  Hz, 3 H);  $^{13}\text{C}$  NMR (100 MHz,  $\text{CDCl}_3$ ):  $\delta = 162.5, 154.9, 133.2, 131.5, 131.0, 129.3, 115.4, 103.2, 66.5, 30.5, 19.0, 13.6$ ; ESI-HRMS Calcd for  $\text{C}_{14}\text{H}_{16}\text{NO}_2[\text{M}+\text{H}]^+$ , 230.1176; found, 230.1162.

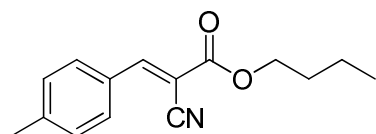

**Butyl 2-cyano-3-p-tolylacrylate (6r).** Yellow liquid;  $^1\text{H}$  NMR (400 MHz,  $\text{CDCl}_3$ ):  $\delta = 8.20$  (s, 1 H), 7.89 (d,  $J = 7.6$  Hz, 2 H), 7.30 (d,  $J = 8.0$  Hz, 2 H), 4.31 (t,  $J = 6.4$  Hz, 2 H), 2.43 (s, 3 H), 1.76-1.72 (m, 2 H), 1.49-1.44 (m, 2 H), 0.98 (t,  $J = 7.2$  Hz, 3 H);  $^{13}\text{C}$  NMR (100 MHz,  $\text{CDCl}_3$ ):  $\delta = 162.8, 154.9, 144.6, 131.2, 130.0, 128.9, 115.7, 101.6, 66.4, 30.5, 21.8, 19.0, 13.6$ ; ESI-HRMS Calcd for  $\text{C}_{15}\text{H}_{18}\text{NO}_2[\text{M}+\text{H}]$ , 244.1332; found, 244.1318.

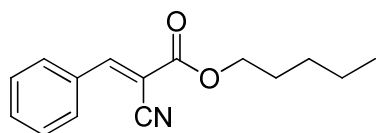

**Pentyl 2-cyano-3-phenylacrylate (6s).** White solid, m.p. 99-101 °C;  $^1\text{H}$  NMR (400 MHz,  $\text{CDCl}_3$ ).  $\delta = 8.25$  (s, 1 H), 7.99 (d,  $J = 8.4$  Hz, 2 H), 7.56-7.48 (m, 3 H), 4.32 (t,  $J = 6.8$  Hz, 2 H), 1.78-1.73 (m, 2 H), 1.43-1.35 (m, 4 H), 0.93 (t,  $J = 7.2$  Hz, 3 H);  $^{13}\text{C}$  NMR (100 MHz,  $\text{CDCl}_3$ ):  $\delta = 162.5, 154.9, 133.2, 131.5, 131.0, 129.2, 115.4, 103.2,$

66.8, 28.2, 27.9, 22.2, 13.9; ESI-HRMS Calcd for  $C_{15}H_{18}NO_2[M+H]^+$ , 244.1332; found, 244.1327.

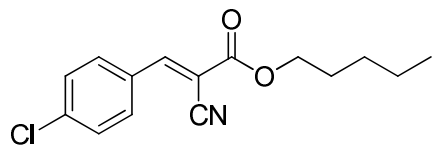

**Pentyl 3-(4-chlorophenyl)-2-cyanoacrylate (6t).** White solid, m.p. 78-79 °C;  $^1H$  NMR (400 MHz,  $CDCl_3$ ):  $\delta$  = 8.19 (s, 1 H), 7.94 (d,  $J$  = 8.4 Hz, 2 H), 7.48 (d,  $J$  = 8.4 Hz, 2 H), 4.32 (t,  $J$  = 6.8 Hz, 2 H), 1.79-1.73 (m, 2 H), 1.43-1.35 (m, 4 H), 0.93 (t,  $J$  = 6.8 Hz, 3 H);  $^{13}C$  NMR (100 MHz,  $CDCl_3$ ):  $\delta$  = 162.3, 153.3, 139.6, 132.2, 129.9, 129.7, 115.2, 103.6, 66.9, 28.2, 27.9, 22.2, 13.9; ESI-HRMS Calcd for  $C_{15}H_{17}ClNO_2[M+H]^+$ , 278.0942; found, 278.0937.

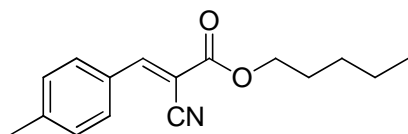

**Pentyl 2-cyano-3-p-tolylacrylate (6u).** Pale yellow solid, m.p. 43-45 °C;  $^1H$  NMR (400 MHz,  $CDCl_3$ ):  $\delta$  = 8.21 (s, 1 H), 7.90 (d,  $J$  = 8.0 Hz, 2 H), 7.30 (d,  $J$  = 6.8 Hz, 2 H), 4.31 (t,  $J$  = 6.8 Hz, 2 H), 2.43 (s, 3 H), 1.78-1.74 (m, 2 H), 1.41-1.37 (m, 4 H), 0.92 (t,  $J$  = 8.8, 3 H);  $^{13}C$  NMR (100 MHz,  $CDCl_3$ ):  $\delta$  = 162.8, 154.9, 144.6, 131.2, 130.0, 128.9, 115.7, 101.6, 66.7, 28.2, 27.9, 22.2, 21.8, 13.9; ESI-HRMS Calcd for  $C_{16}H_{20}NO_2[M+H]^+$ , 258.1489; found, 258.1476.

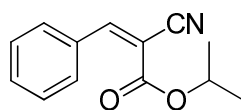

**Isopropyl 2-cyano-3-phenylacrylate (6v).** Yellow solid, m.p. 69-70 °C;  $^1H$  NMR (400 MHz,  $CDCl_3$ ):  $\delta$  = 8.24 (s, 1 H), 7.99 (t,  $J$  = 7.2 Hz, 2 H), 7.57-7.45 (m, 3 H), 5.24-5.17 (m, 1 H), 1.38 (d,  $J$  = 6.4 Hz, 6 H);  $^{13}C$  NMR (100 MHz,  $CDCl_3$ ):  $\delta$  = 161.9, 154.7, 133.2, 131.6, 131.0, 129.2, 115.4, 103.5, 70.8, 21.7; ESI-HRMS Calcd for  $C_{13}H_{14}NO_2[M+H]^+$ , 216.1019; found, 216.1031.

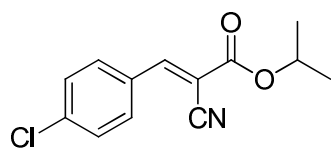

**Isopropyl 3-(4-chlorophenyl)-2-cyanoacrylate (6w).** White solid, m.p. 107-109 °C; <sup>1</sup>H NMR (400 MHz, CDCl<sub>3</sub>): δ = 8.18 (s, 1 H), 7.93 (d, *J* = 8.4 Hz, 2 H), 7.47 (d, *J* = 8.4 Hz, 2 H), 5.24-5.17 (m, 1 H), 1.38 (d, *J* = 6.4 Hz, 6 H); <sup>13</sup>C NMR (100 MHz, CDCl<sub>3</sub>): δ = 161.7, 153.0, 139.4, 132.1, 130.0, 129.6, 115.2, 104.1, 71.0, 21.7; ESI-HRMS Calcd for C<sub>13</sub>H<sub>13</sub>ClNO<sub>2</sub>[M+H]<sup>+</sup>, 250.0629; found, 250.0629.

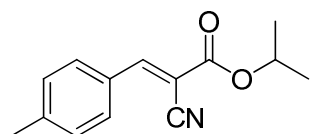

**Isopropyl 2-cyano-3-*p*-tolylacrylate (6x).** Yellow liquid; <sup>1</sup>H NMR (400 MHz, CDCl<sub>3</sub>): δ = 8.19 (s, 1 H), 7.89 (d, *J* = 7.6 Hz, 2 H), 7.29 (d, *J* = 7.2 Hz, 2 H), 5.24-5.13 (m, 1 H), 2.43 (s, 3 H), 1.37 (d, *J* = 6.0 Hz, 6 H); <sup>13</sup>C NMR (100 MHz, CDCl<sub>3</sub>): δ = 162.2, 154.7, 144.5, 131.2, 130.0, 129.0, 115.7, 102.1, 70.6, 21.8, 21.7; ESI-HRMS Calcd for C<sub>14</sub>H<sub>16</sub>NO<sub>2</sub>[M+H]<sup>+</sup>, 230.1176; found, 230.1181.

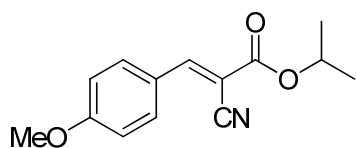

**Isopropyl 2-cyano-3-(4-methoxyphenyl)acrylate (6y).** Yellow solid, m.p. 112-113 °C; <sup>1</sup>H NMR (400 MHz, CDCl<sub>3</sub>): δ = 8.15 (s, 1 H), 7.99 (d, *J* = 8.8 Hz, 2 H), 6.99 (d, *J* = 8.8 Hz, 2 H), 5.22-5.15 (m, 1 H), 3.89 (s, 1 H), 1.37 (d, *J* = 6.4 Hz, 6 H); <sup>13</sup>C NMR (100 MHz, CDCl<sub>3</sub>): δ = 163.7, 162.6, 154.1, 133.5, 124.4, 116.1, 114.7, 99.9, 70.3, 55.6, 21.7; ESI-HRMS Calcd for C<sub>14</sub>H<sub>16</sub>NO<sub>3</sub>[M+H]<sup>+</sup>, 246.1125; found, 246.1129.

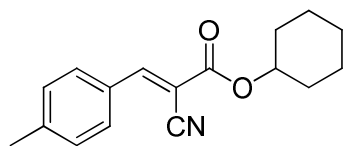

**Cyclohexyl 2-cyano-3-(*p*-tolyl)acrylate (6z).** White solid, m.p. 82-83 °C; <sup>1</sup>H NMR (400 MHz, CDCl<sub>3</sub>): δ = 8.19 (s, 1 H), 7.89 (d, 2 H, *J* = 8.0 Hz), 7.29 (d, 2 H, *J* = 8.0 Hz); 5.01-4.95 (m, 1 H), 2.43 (s, 3 H), 1.92-1.89 (m, 2 H), 1.79-1.78 (m, 2 H), 1.65-1.57 (m, 3 H), 1.44-1.33 (m, 3 H); <sup>13</sup>C NMR (100 MHz, CDCl<sub>3</sub>): δ = 162.1, 154.6, 144.4, 131.2, 130.0, 129.0, 115.8, 102.2, 75.1, 31.4, 25.3, 23.4, 21.8; ESI-HRMS Calcd for C<sub>17</sub>H<sub>20</sub>NO<sub>2</sub>[M+H]<sup>+</sup>, 270.1489; found, 270.1479.



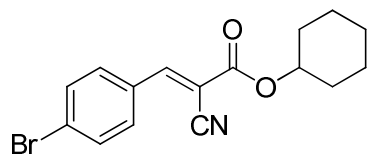

**Cyclohexyl 3-(4-bromophenyl)-2-cyanoacrylate (6aa).** Yellow solid, m.p. 144-145 °C; <sup>1</sup>H NMR (400 MHz, CDCl<sub>3</sub>): δ = 8.16 (s, 1 H), 7.85 (d, 2 H, J = 8.0 Hz), 7.64 (d, 2 H, J = 8.0 Hz), 5.01-4.96 (m, 1 H), 1.96-1.89 (m, 2 H), 1.81-1.78 (m, 2 H), 1.66-1.53 (m, 3 H), 1.48-1.33 (m, 3 H); <sup>13</sup>C NMR (100 MHz, CDCl<sub>3</sub>): δ = 161.6, 153.2, 132.6, 132.2, 130.4, 128.1, 115.3, 104.3, 75.5, 31.3, 25.3, 23.4; ESI-HRMS Calcd for C<sub>16</sub>H<sub>17</sub>BrNO<sub>2</sub>[M+H]<sup>+</sup>, 334.0437; found, 334.0430.

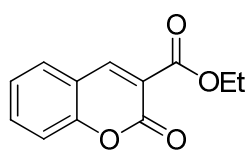

**Ethyl 2-oxo-2H-chromene-3-carboxylate (7).**<sup>6</sup> <sup>1</sup>H NMR (400 MHz, CDCl<sub>3</sub>): δ = 8.54 (s, 1 H), 7.67-7.62 (m, 2 H), 7.36-7.32 (m, 2 H), 4.44-4.39 (q, J = 7.2 Hz, 2 H), 1.41 (t, J = 7.2 Hz, 3 H); <sup>13</sup>C NMR (100 MHz, CDCl<sub>3</sub>): δ = 163.0, 156.5, 155.2, 148.4, 134.2, 129.5, 124.8, 118.4, 117.9, 116.7, 61.9, 14.0.

## References

- (1) S.-I. Murahashi, T. Naota, H. Taki, M. Mizuno, H. Hakaya, S. Komiya, Y. Mizuho, N. Oyasato, M. Hiraoka, M. Hirano and A. Fukuoka, *J. Am. Chem. Soc.*, 1995, **117**, 12436.
- (2) H. Wang, L. Li, X.-F. Bai, W.-H. Deng, Z.-J. Zheng, K.-F. Yang, L.-W. Xu, *Green Chem.*, 2013, **15**, 2349.
- (3) K. K. Senapati, Borgohain, C.; Phukan, P. *J. Mol. Catal. A: Chem.*, 2011, **339**, 24.
- (4) G. Li, J. Xiao, W. Zhang, *Green Chem.*, 2011, **13**, 1828.
- (5) Y. Peng, J. Wang, J. Long, G. Liu, *Catal. Commun.*, 2011, **15**, 10.
- (6) X. He, Z. Yan, X. Hu, Y. Zuo, C. Jiang, L. Jin, Y. Shang, *Synth. Commun.*, 2014, **44**, 1507.

$^1\text{H}$  and  $^{13}\text{C}$  NMR of **6a**

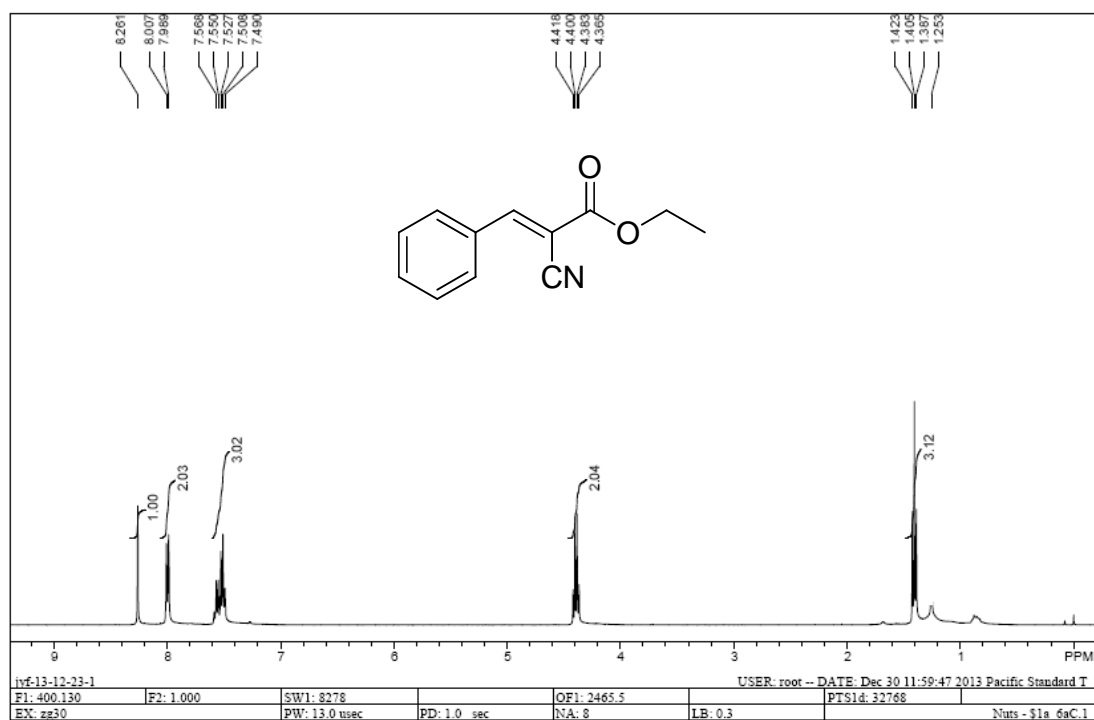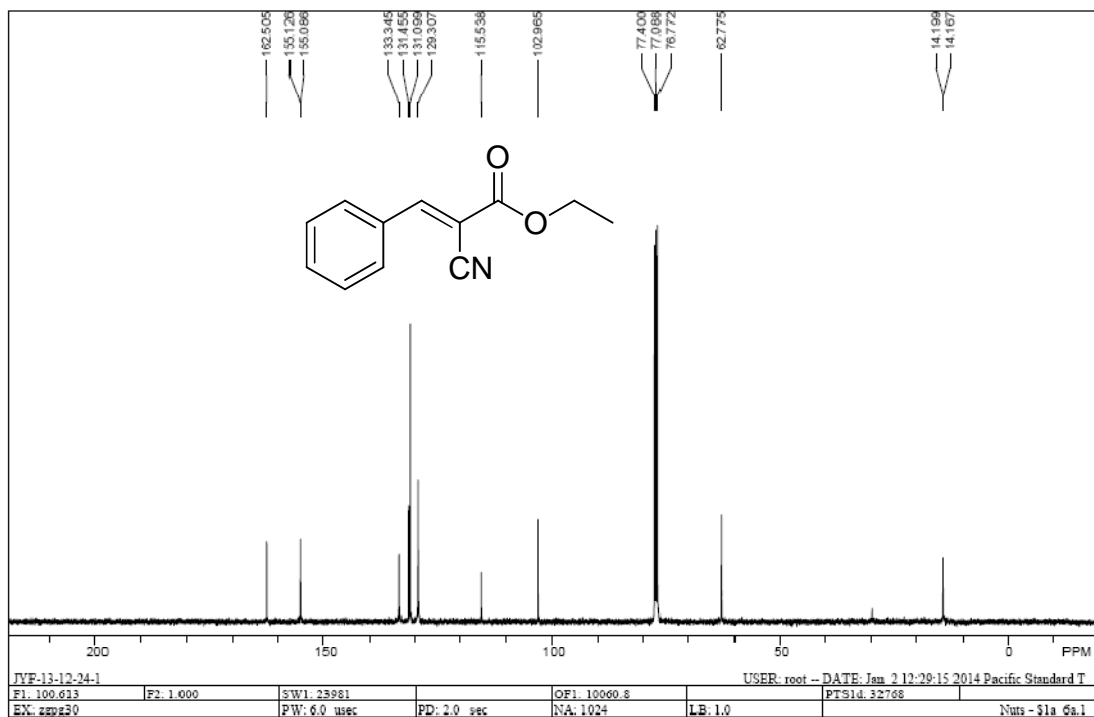

$^1\text{H}$  and  $^{13}\text{C}$  NMR of **6b**

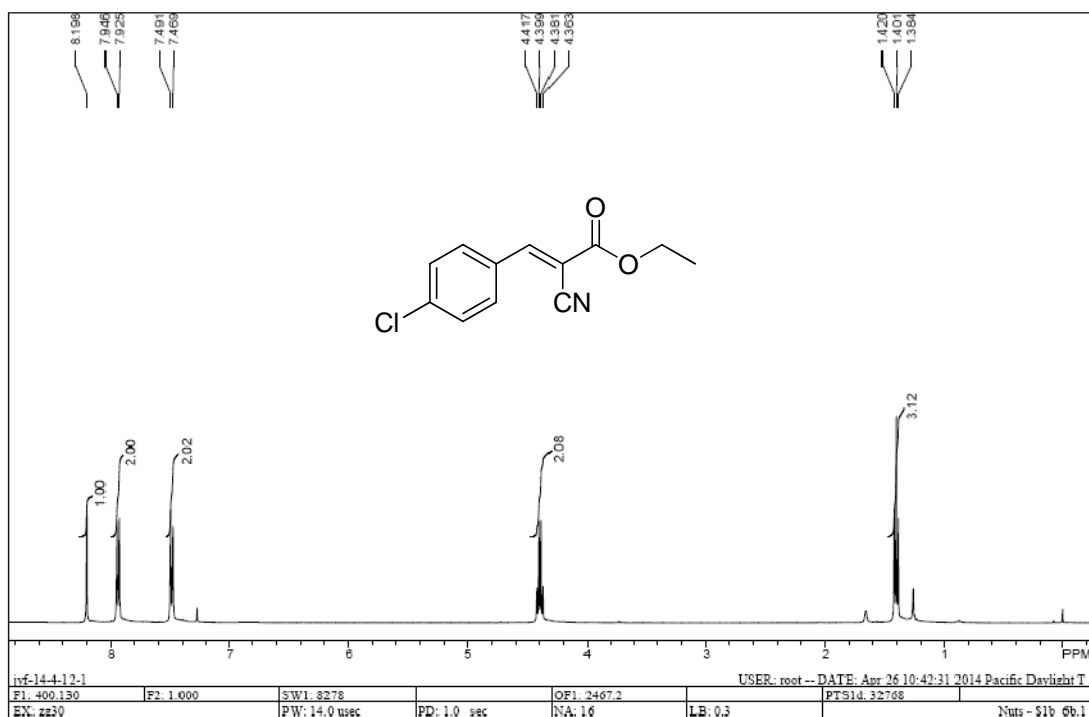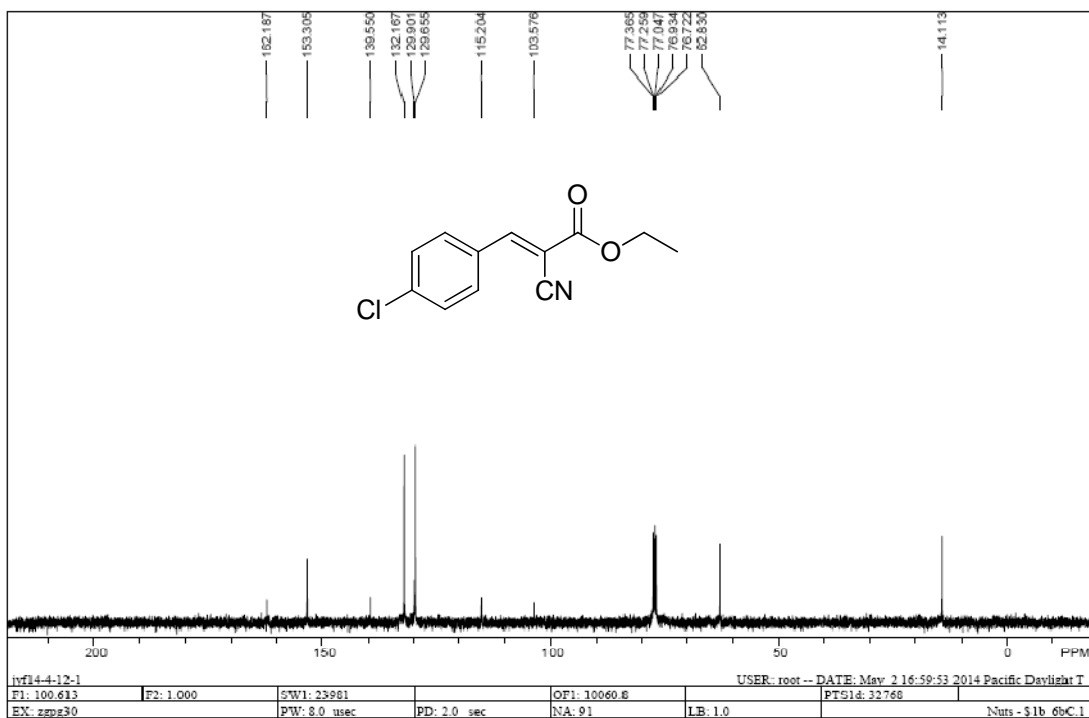

$^1\text{H}$  and  $^{13}\text{C}$  NMR of **6c**

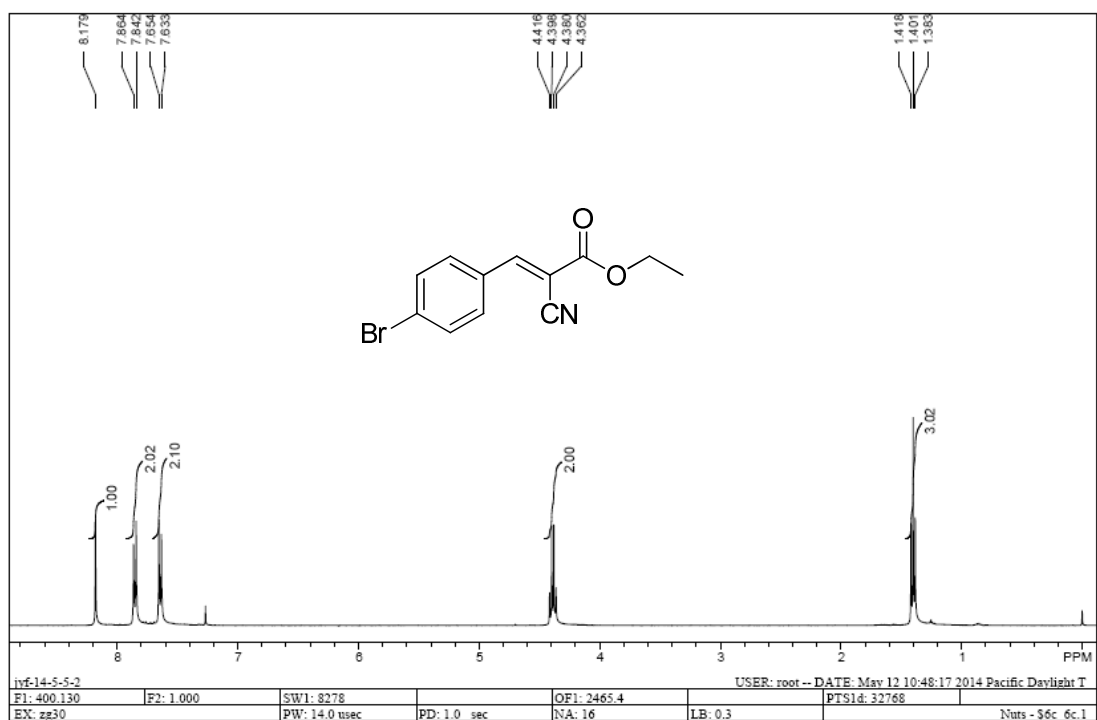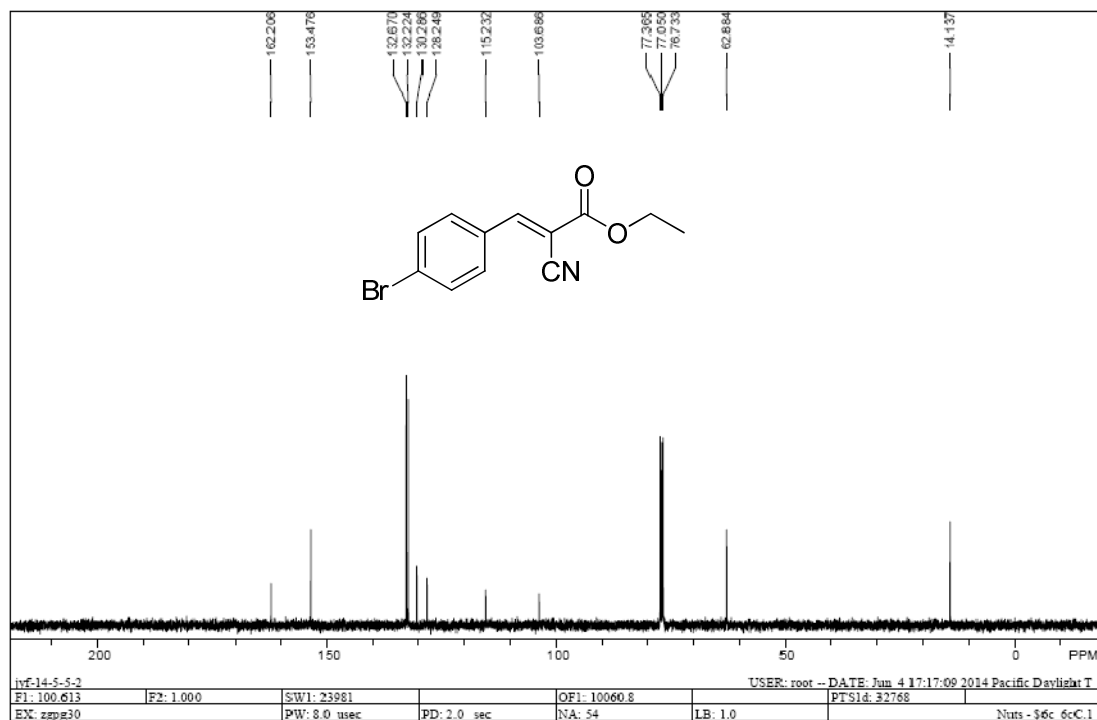

$^1\text{H}$  and  $^{13}\text{C}$  NMR of **6d**

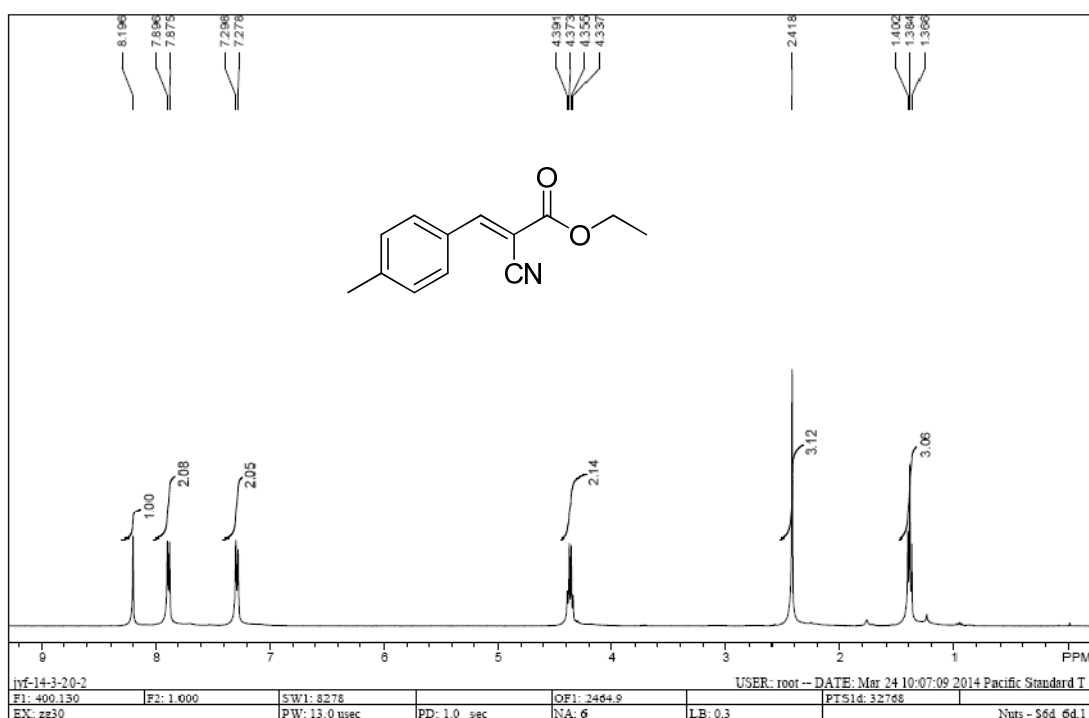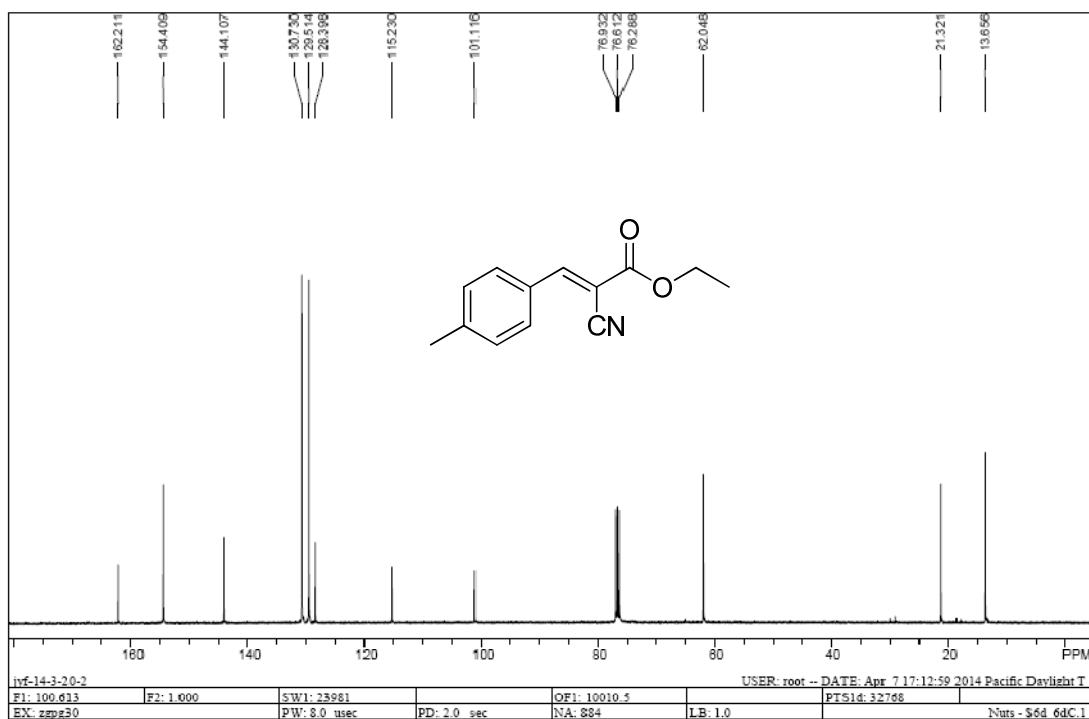

$^1\text{H}$  and  $^{13}\text{C}$  NMR of **6e**

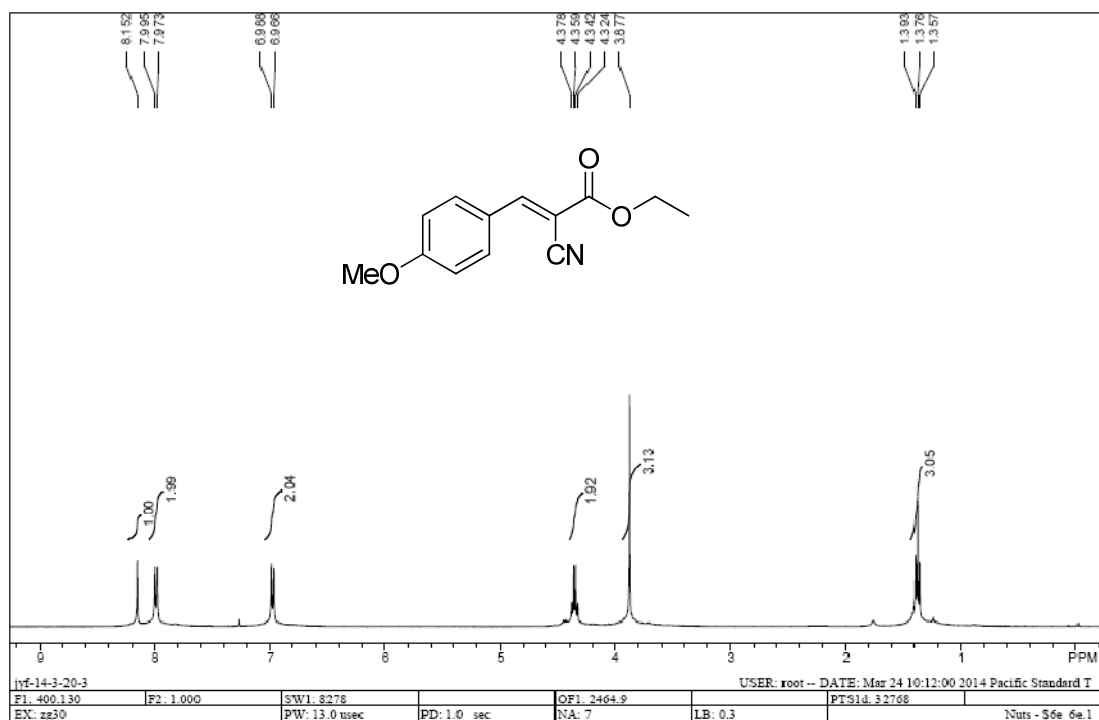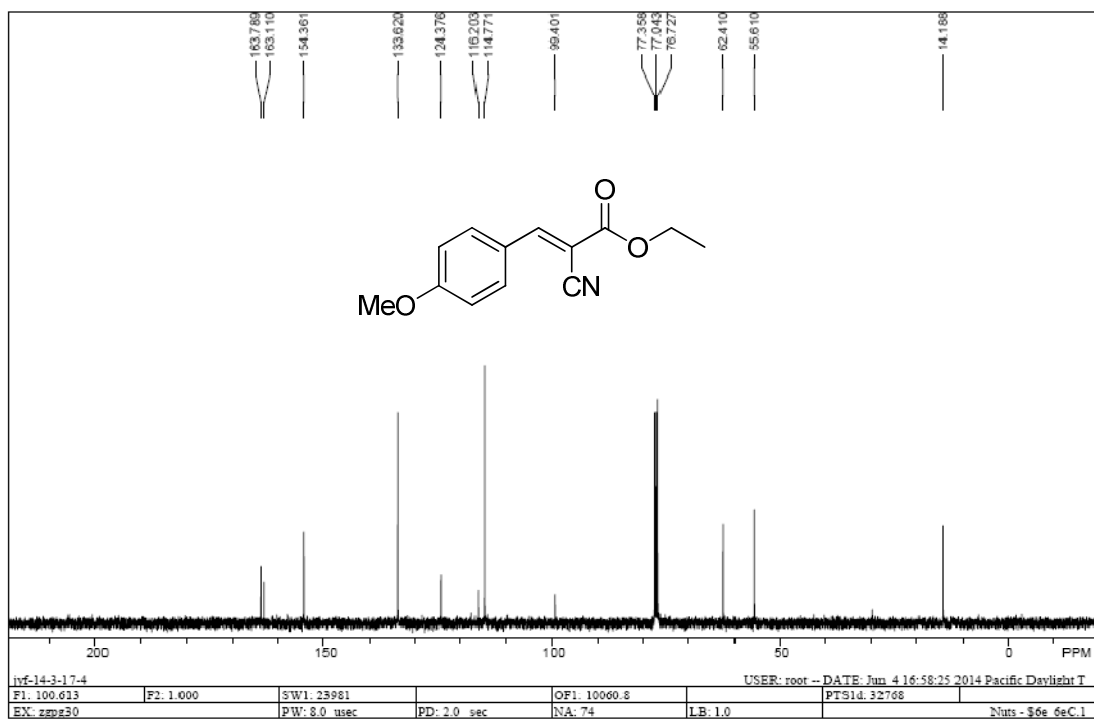

$^1\text{H}$  and  $^{13}\text{C}$  NMR of **6f**

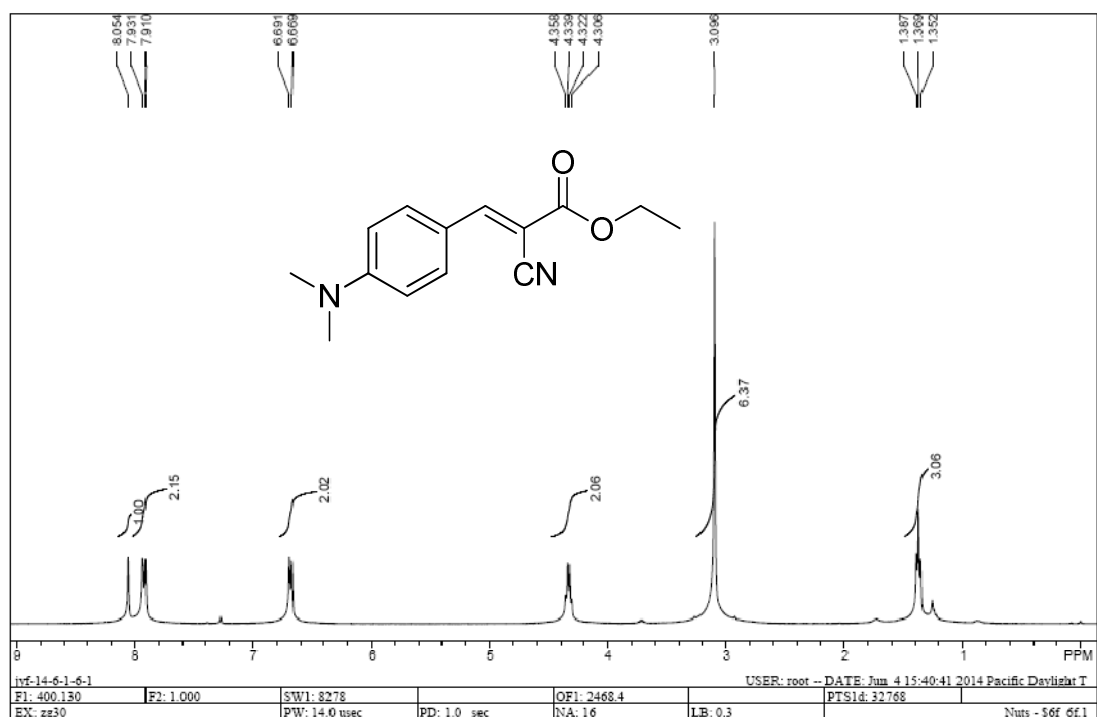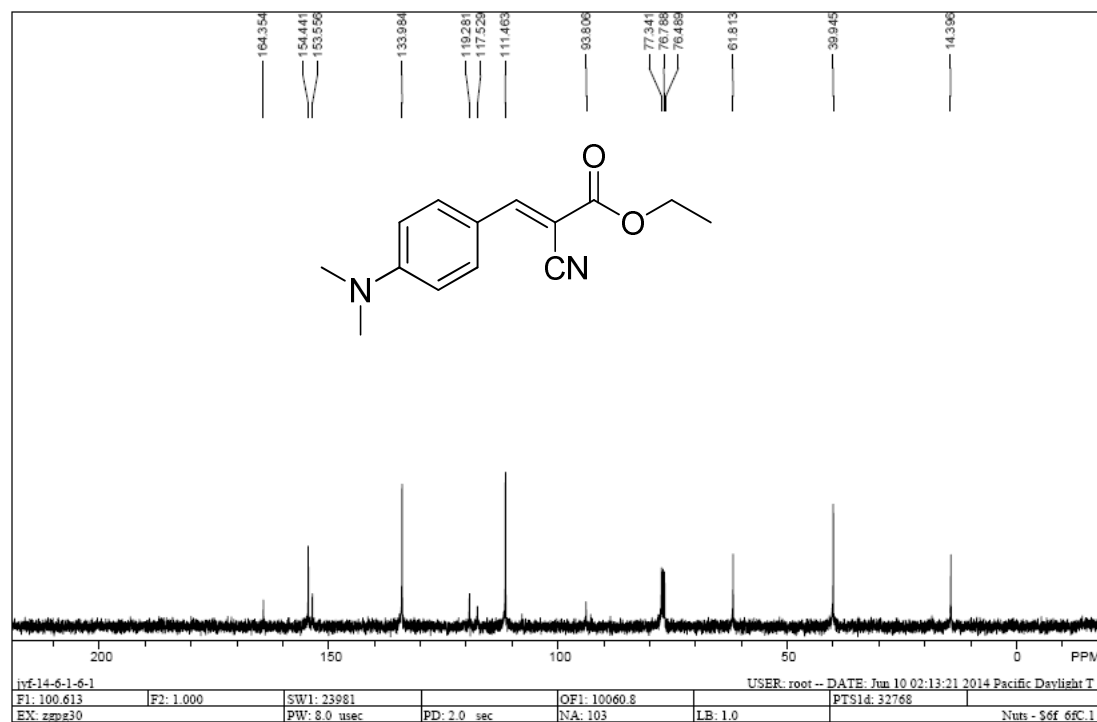

$^1\text{H}$  and  $^{13}\text{C}$  NMR of **6g**

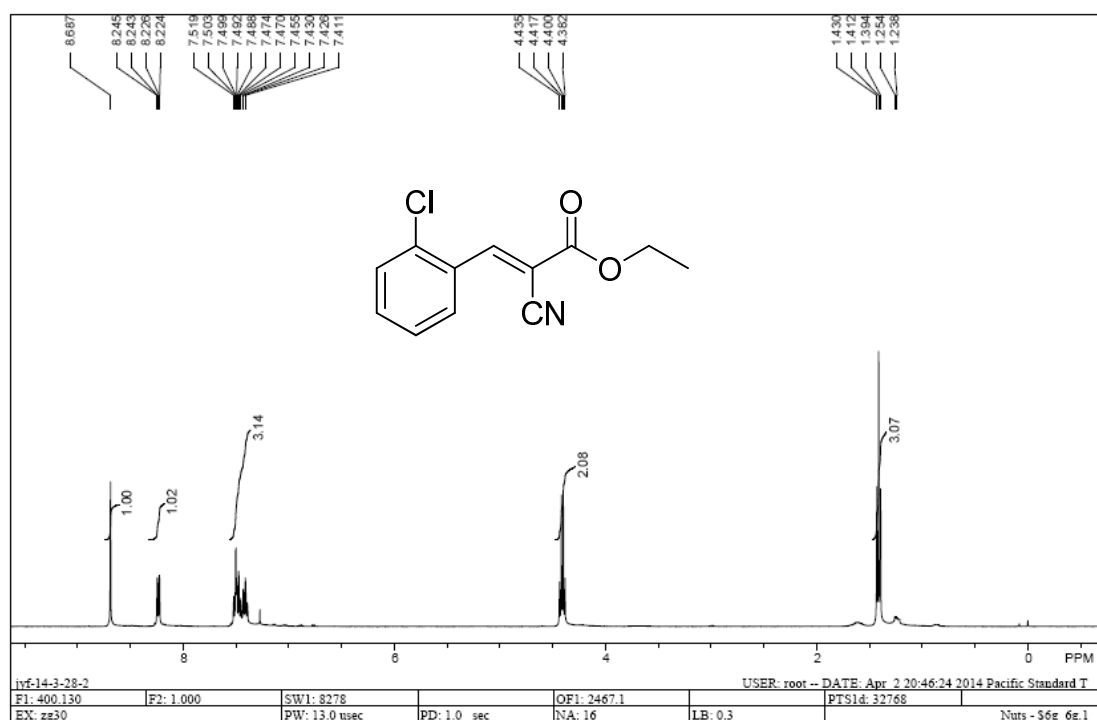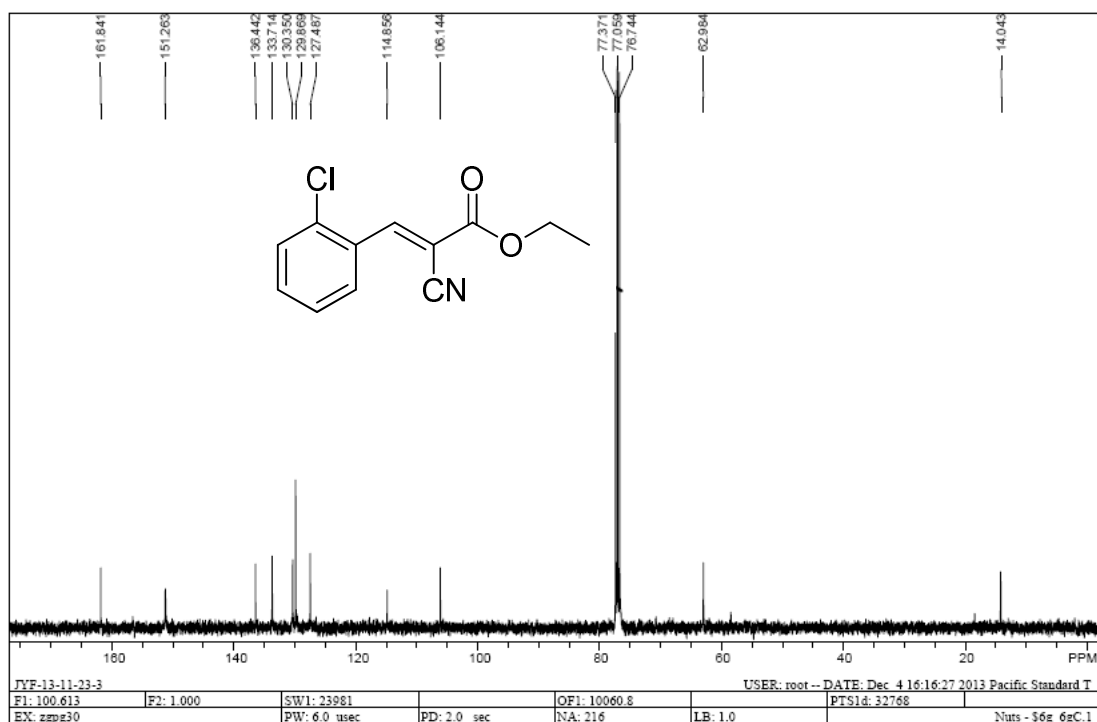



$^1\text{H}$  and  $^{13}\text{C}$  NMR of **6h**

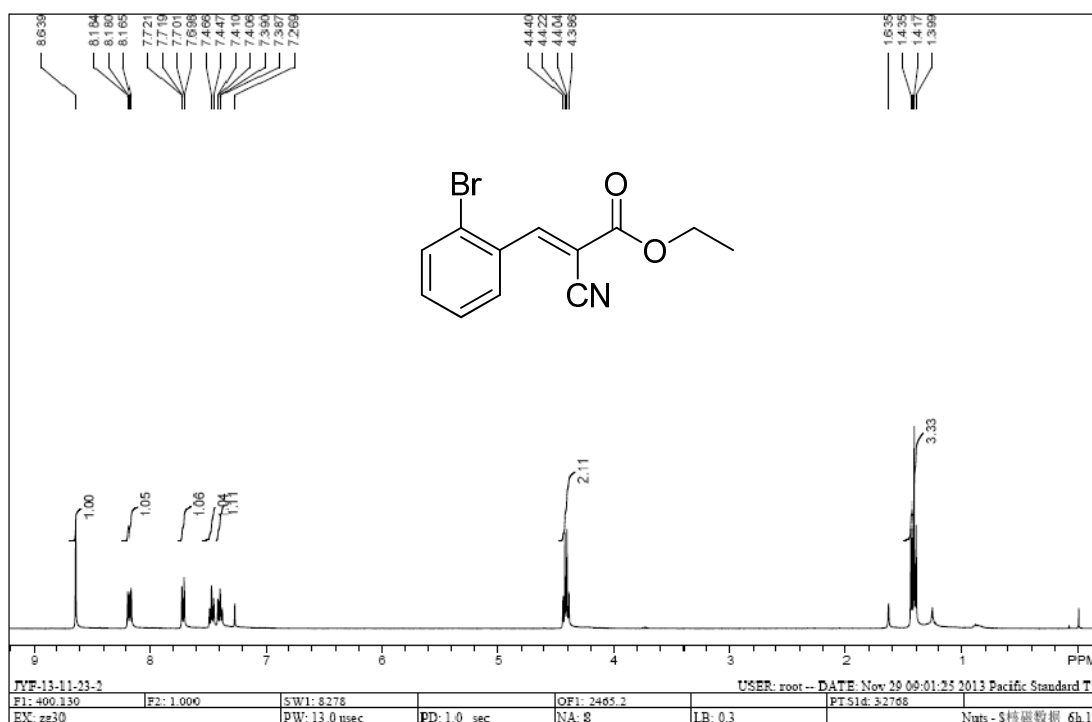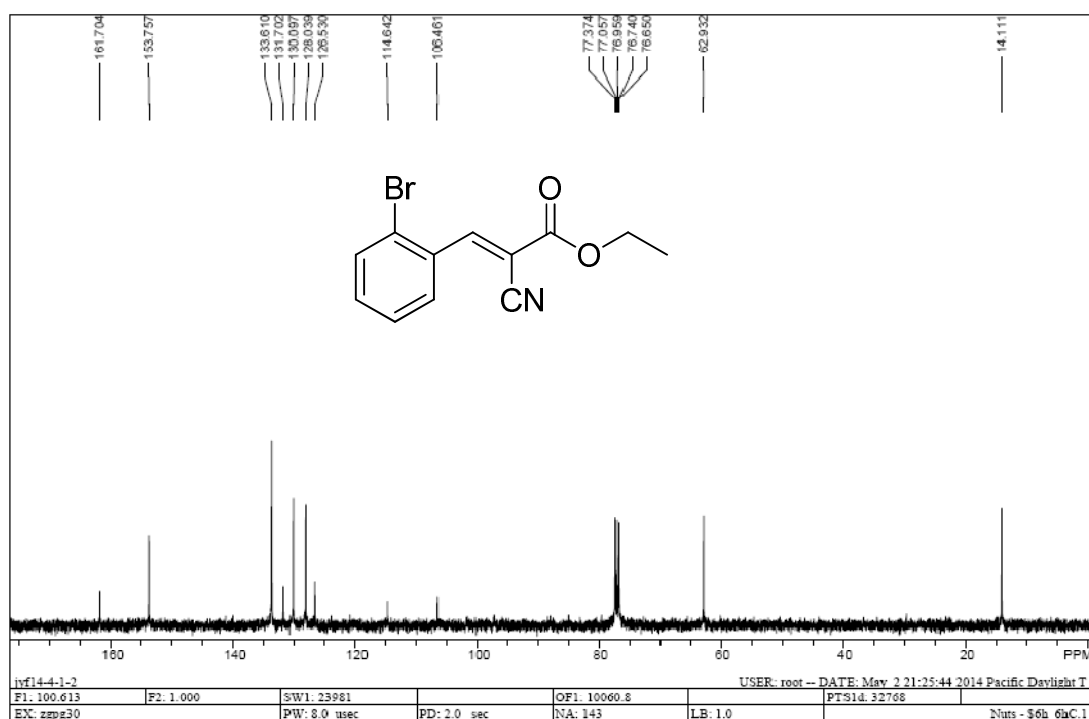

$^1\text{H}$  and  $^{13}\text{C}$  NMR of **6i**

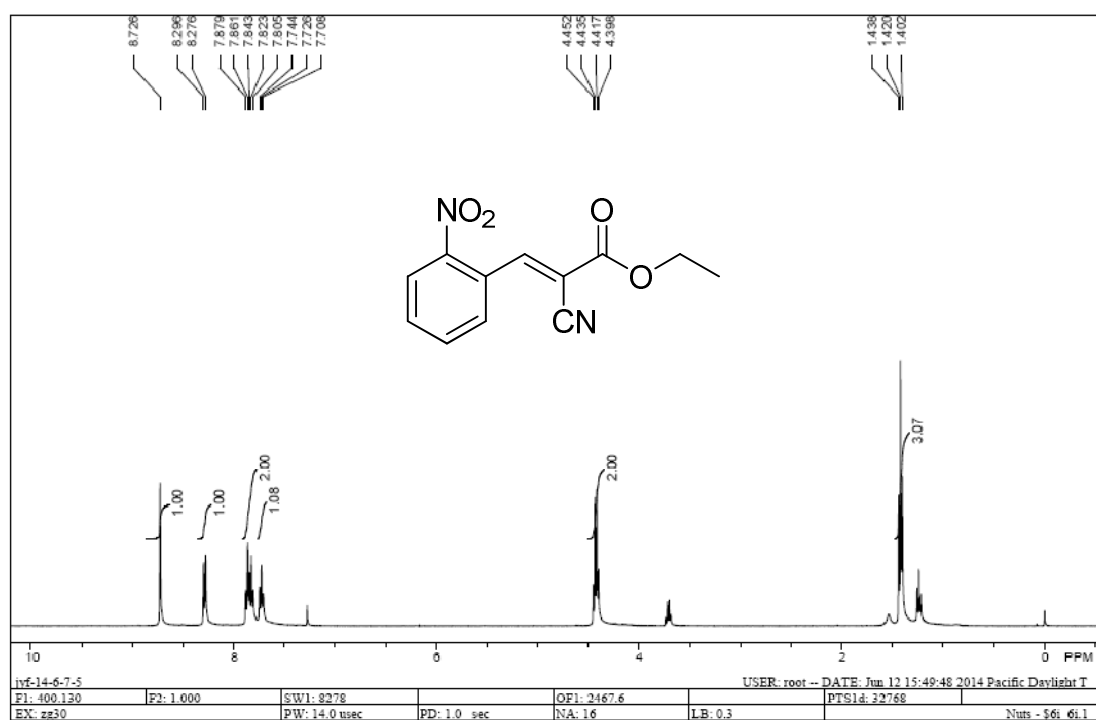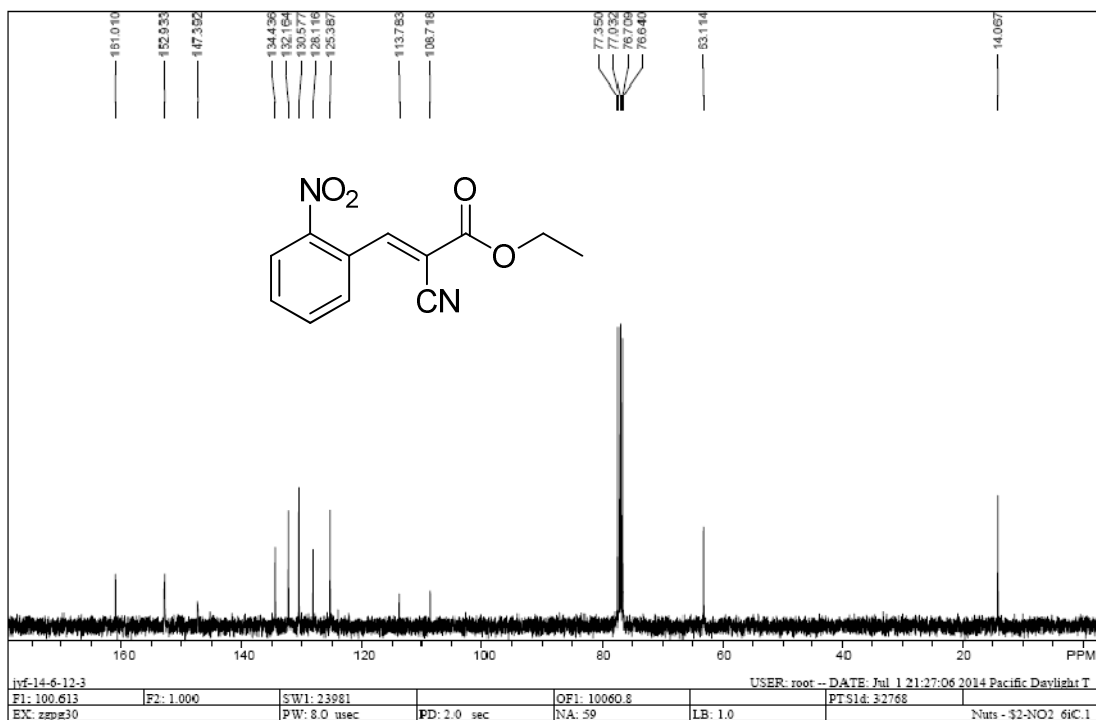

$^1\text{H}$  and  $^{13}\text{C}$  NMR of **6j**

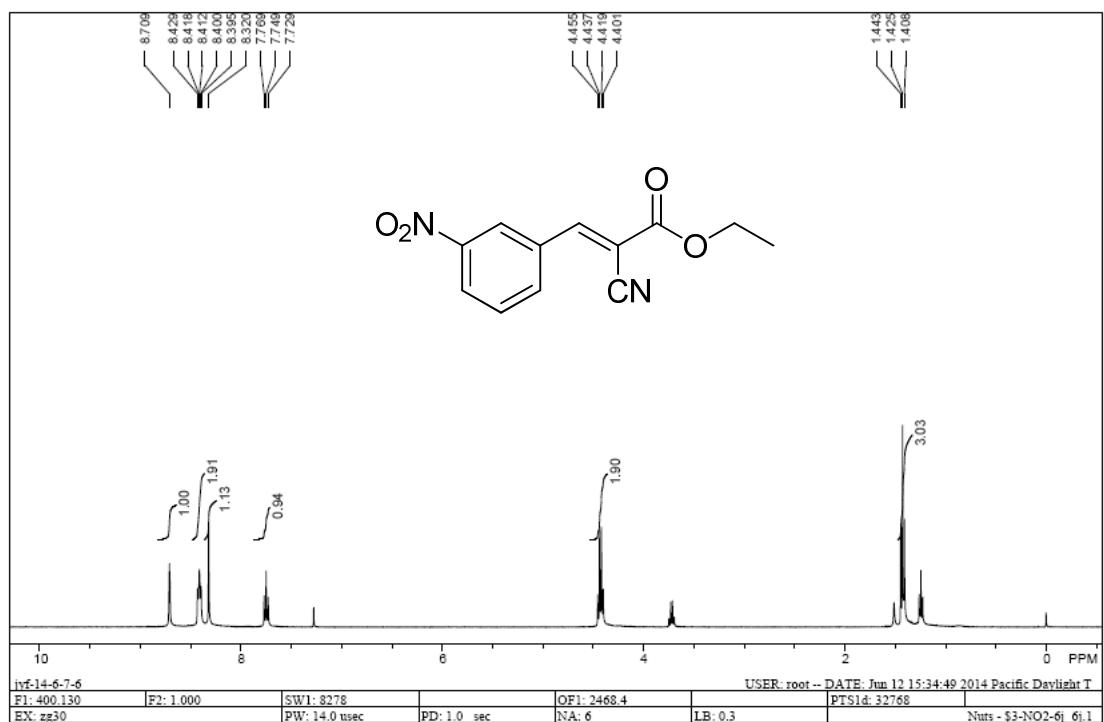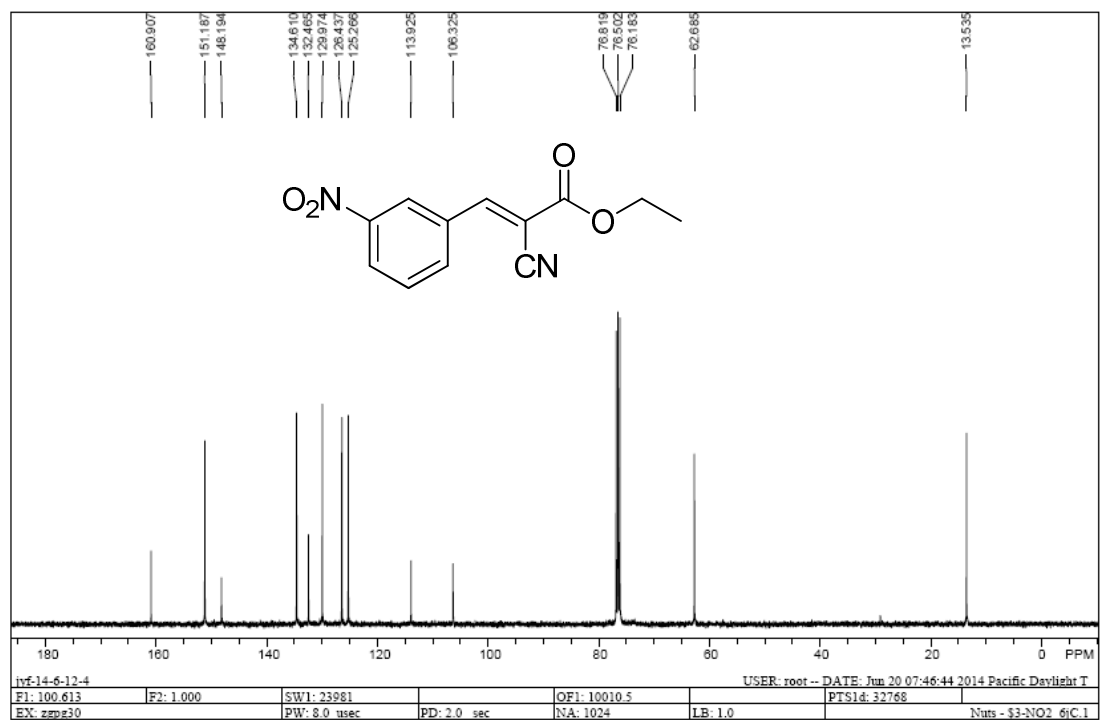

$^1\text{H}$  and  $^{13}\text{C}$  NMR of **6k**

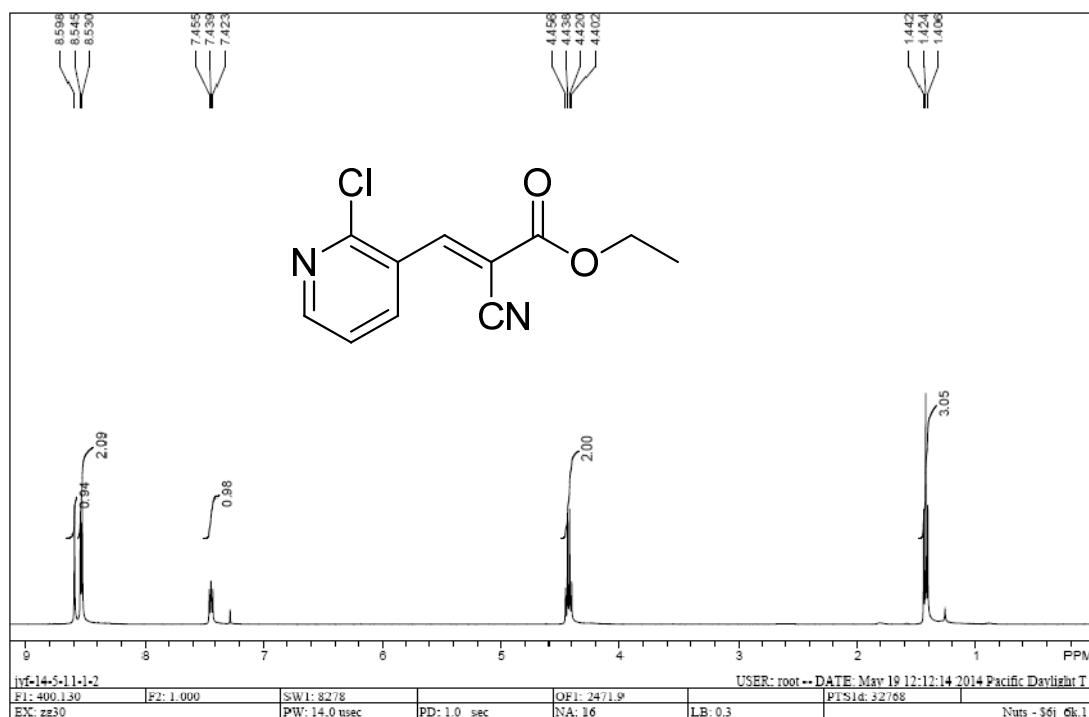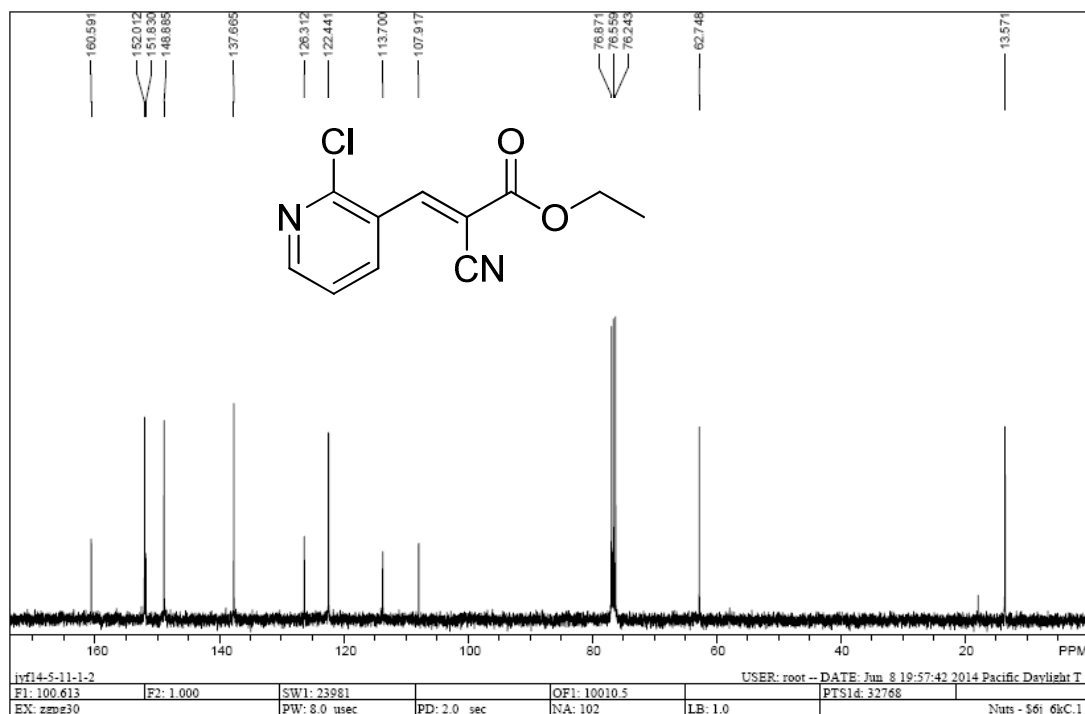

$^1\text{H}$  and  $^{13}\text{C}$  NMR of **6l**

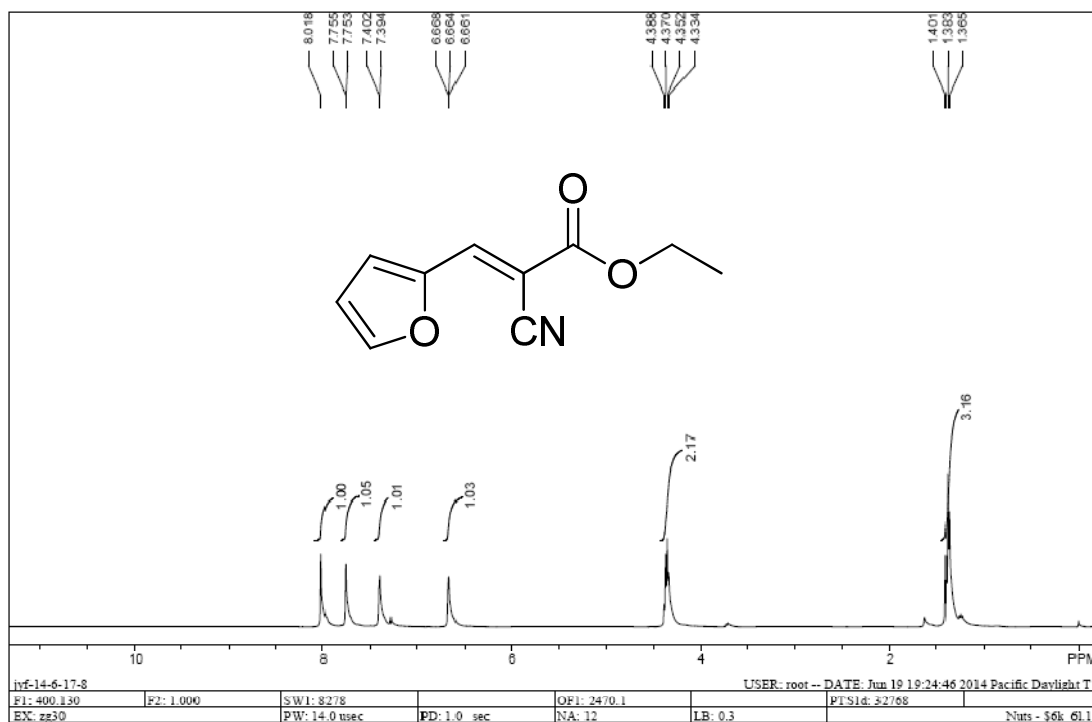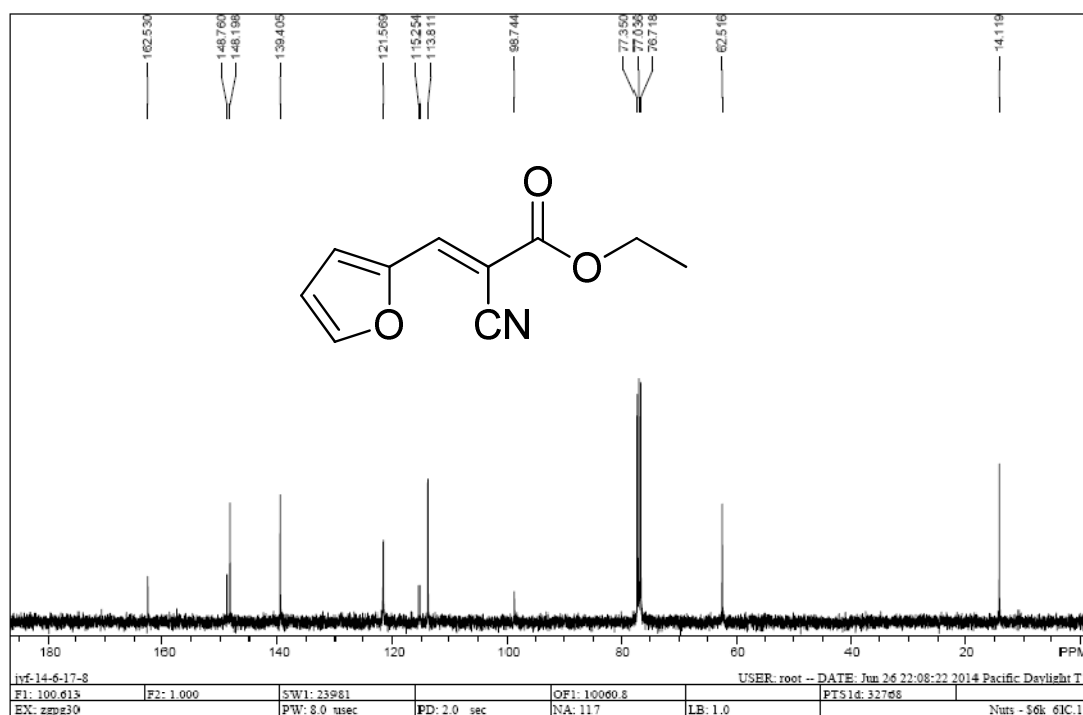

$^1\text{H}$  and  $^{13}\text{C}$  NMR of **6m**

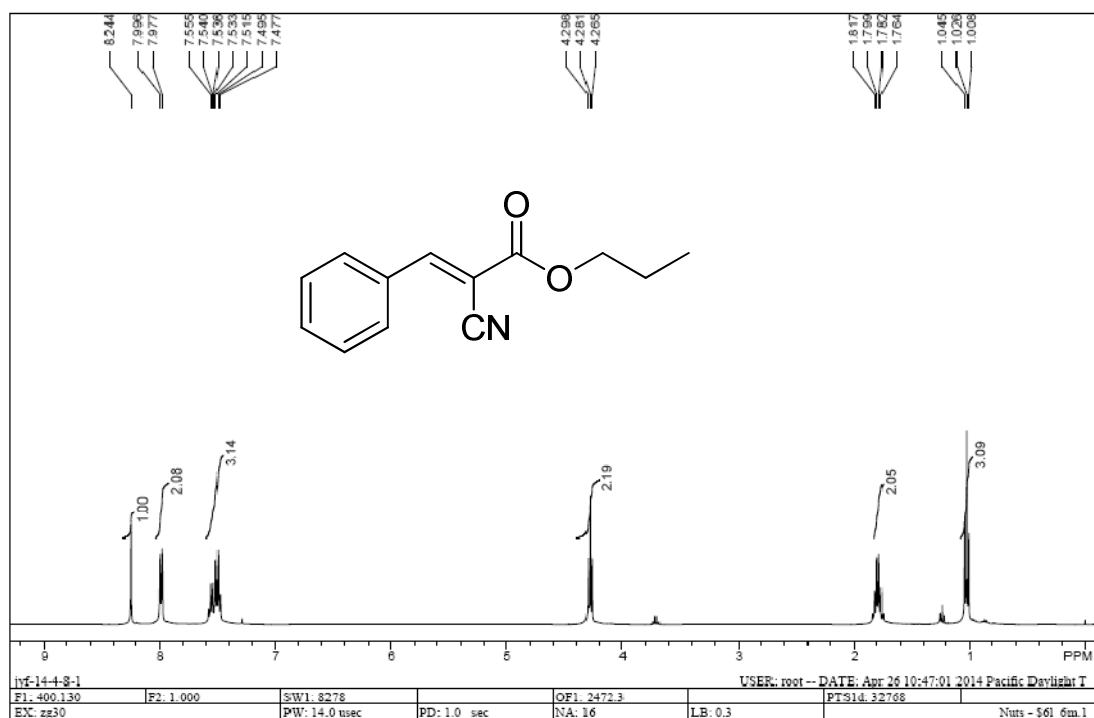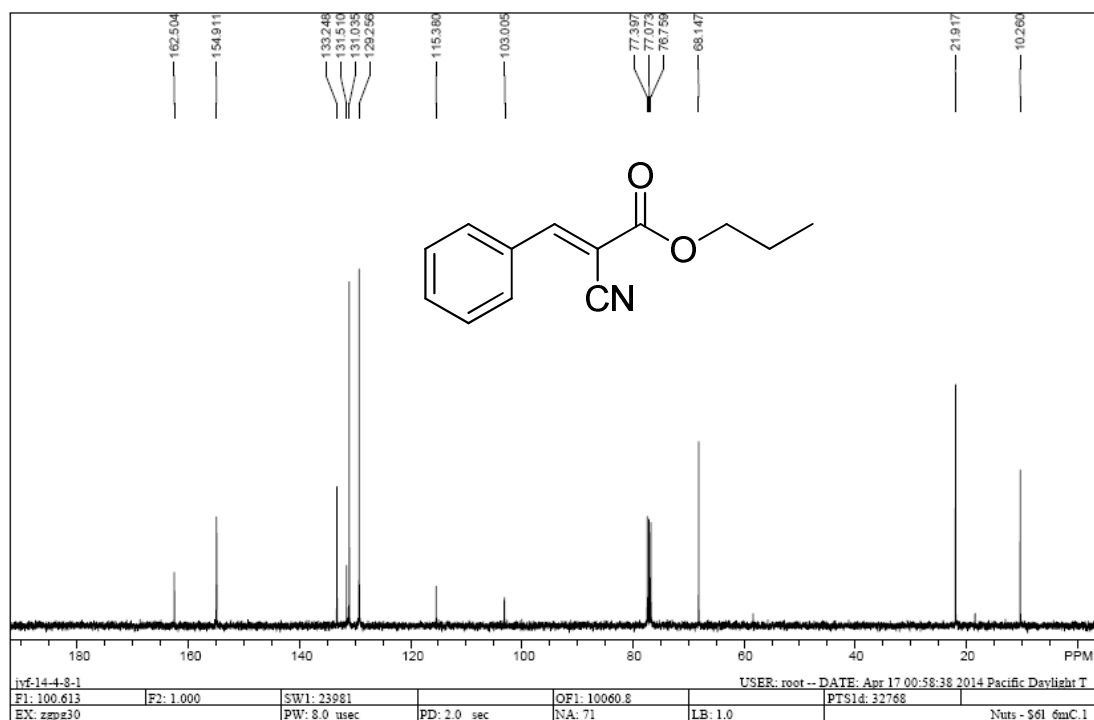

$^1\text{H}$  and  $^{13}\text{C}$  NMR of **6n**

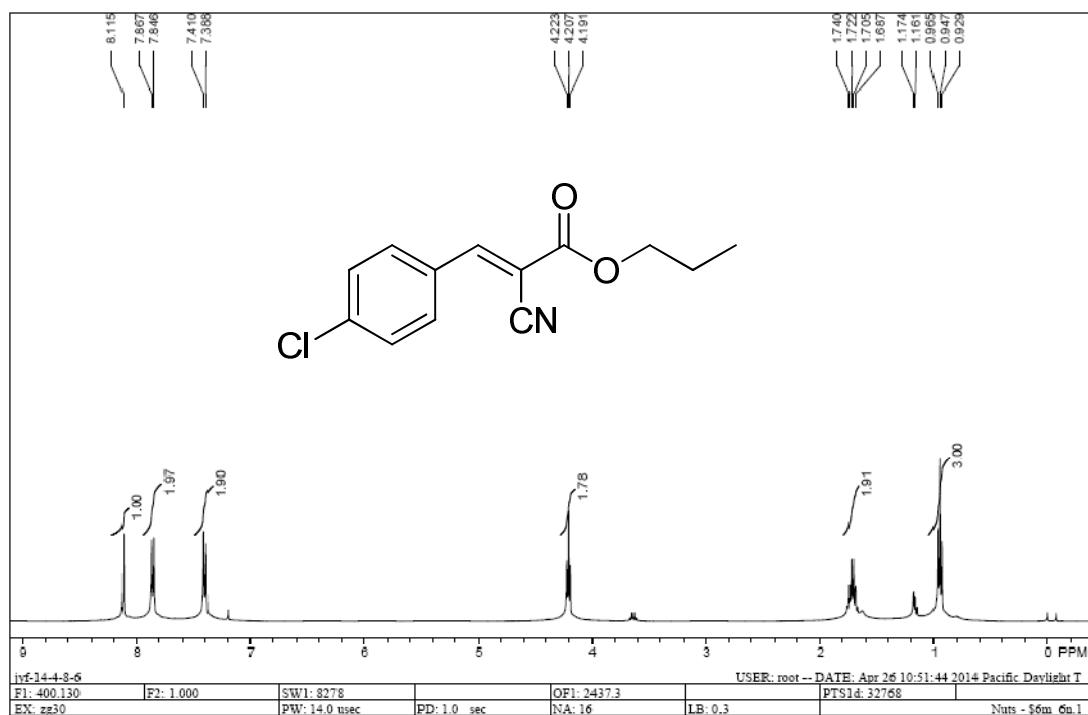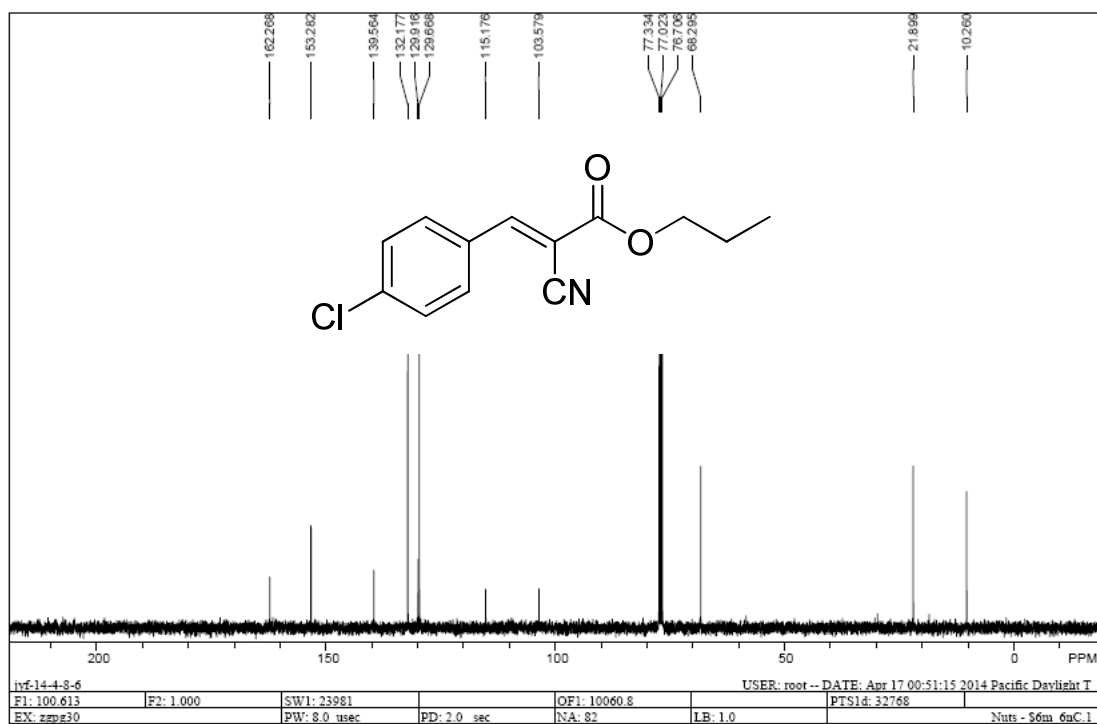

$^1\text{H}$  and  $^{13}\text{C}$  NMR of **60**

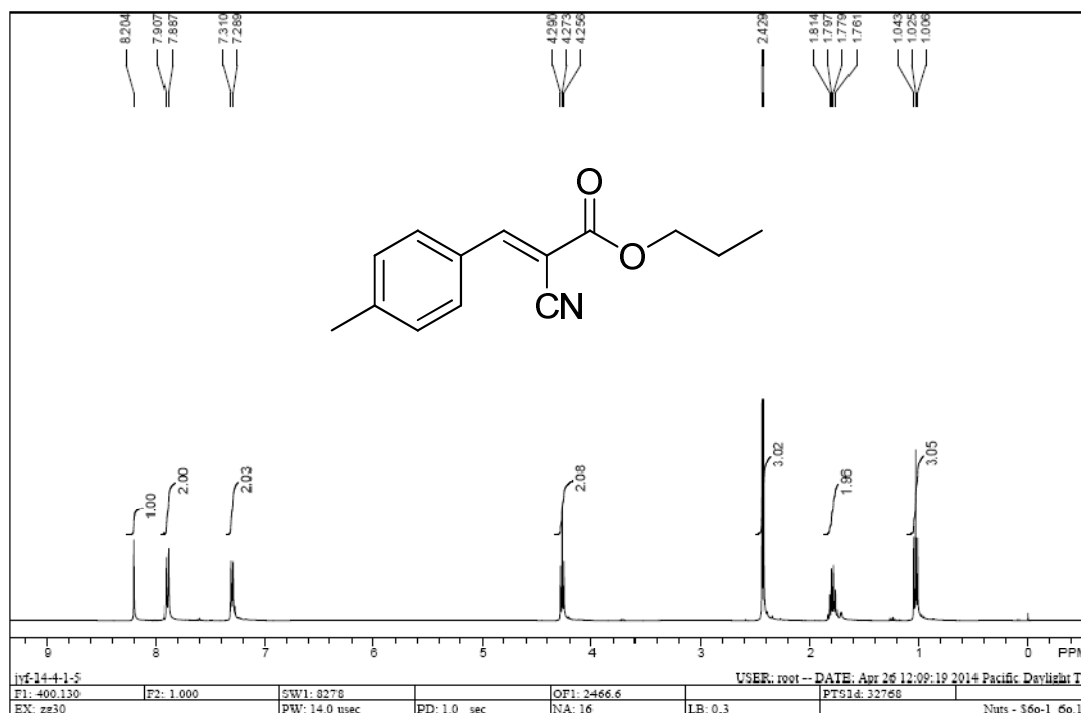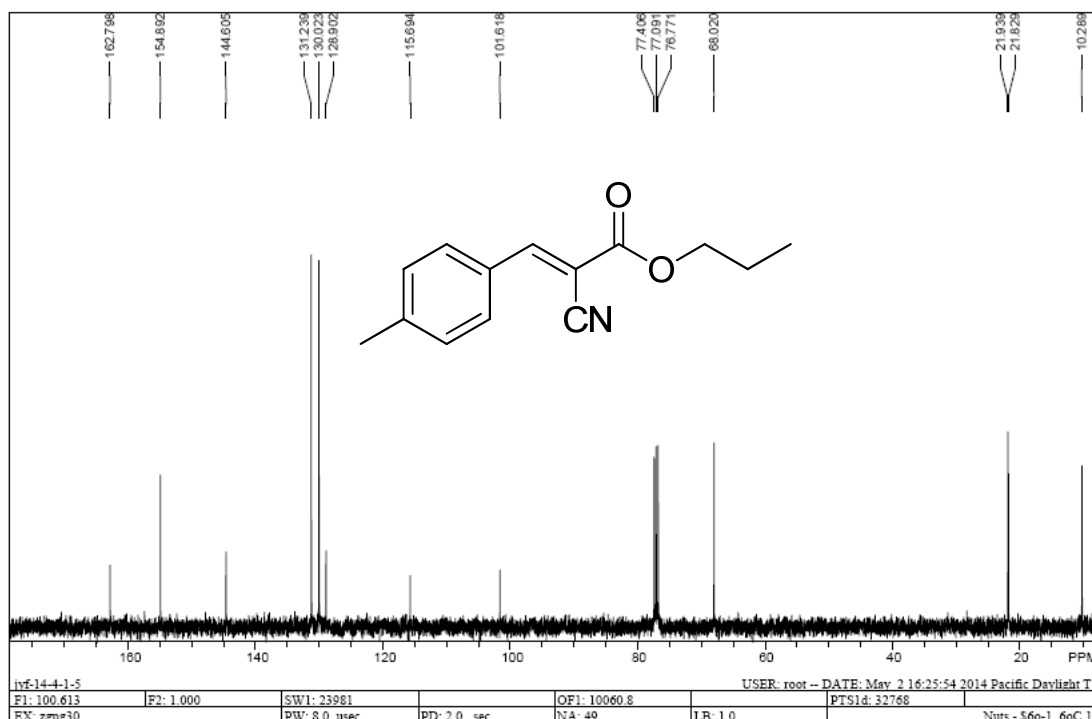



$^1\text{H}$  and  $^{13}\text{C}$  NMR of **6p**

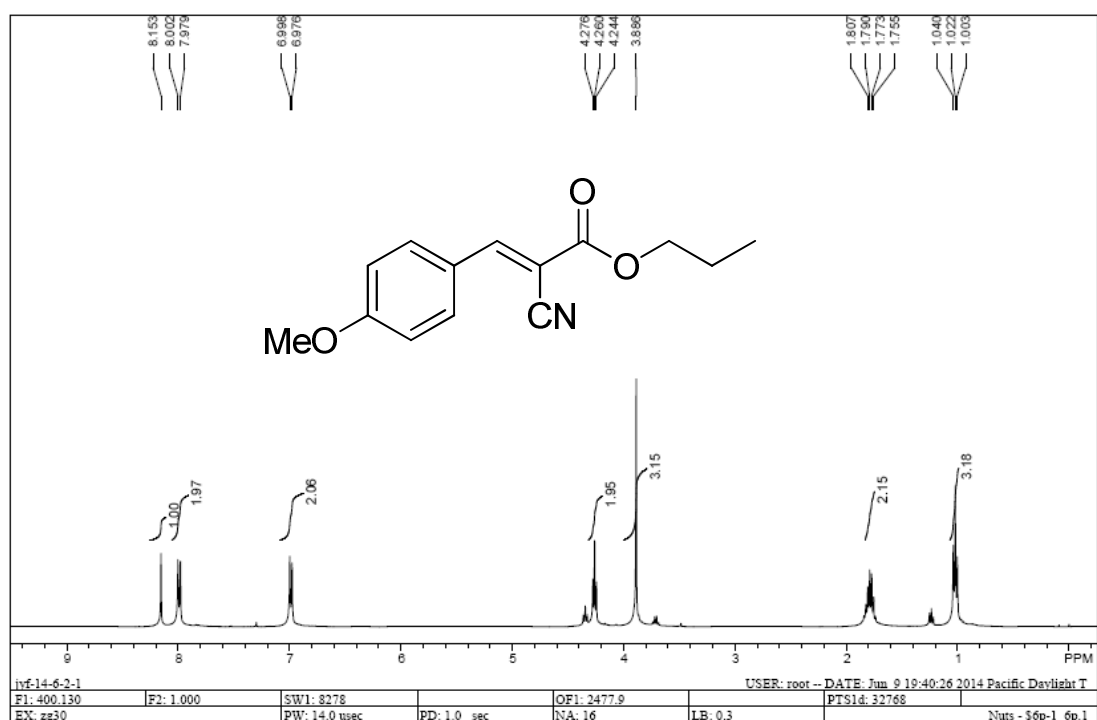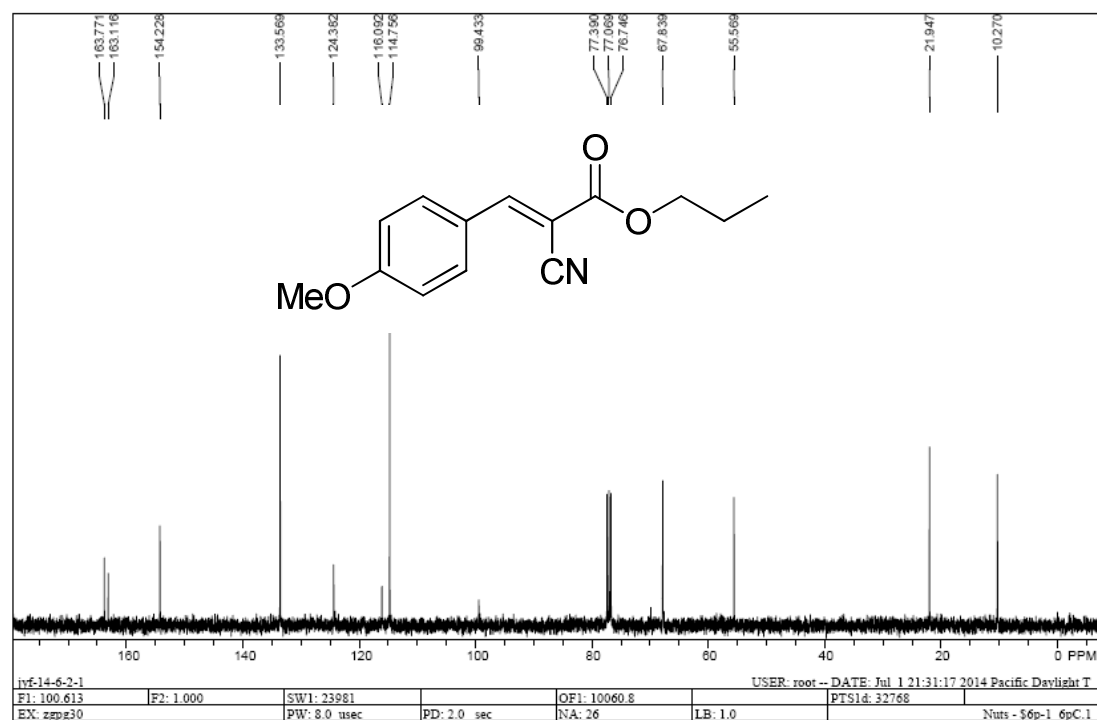

$^1\text{H}$  and  $^{13}\text{C}$  NMR of **6q**

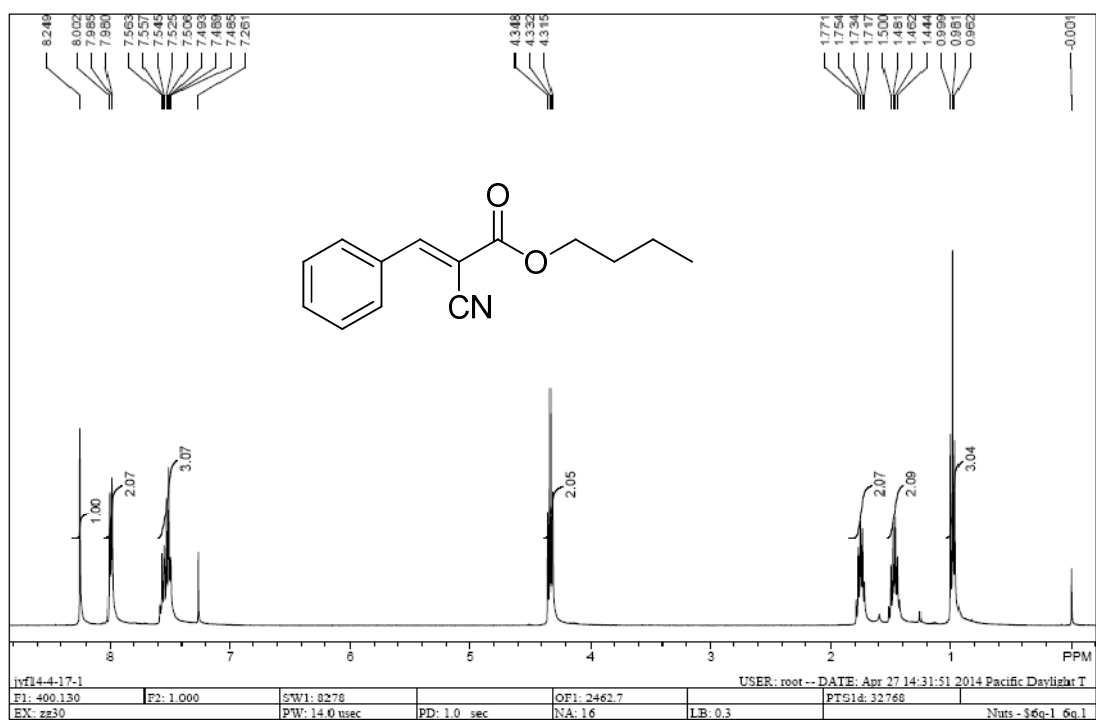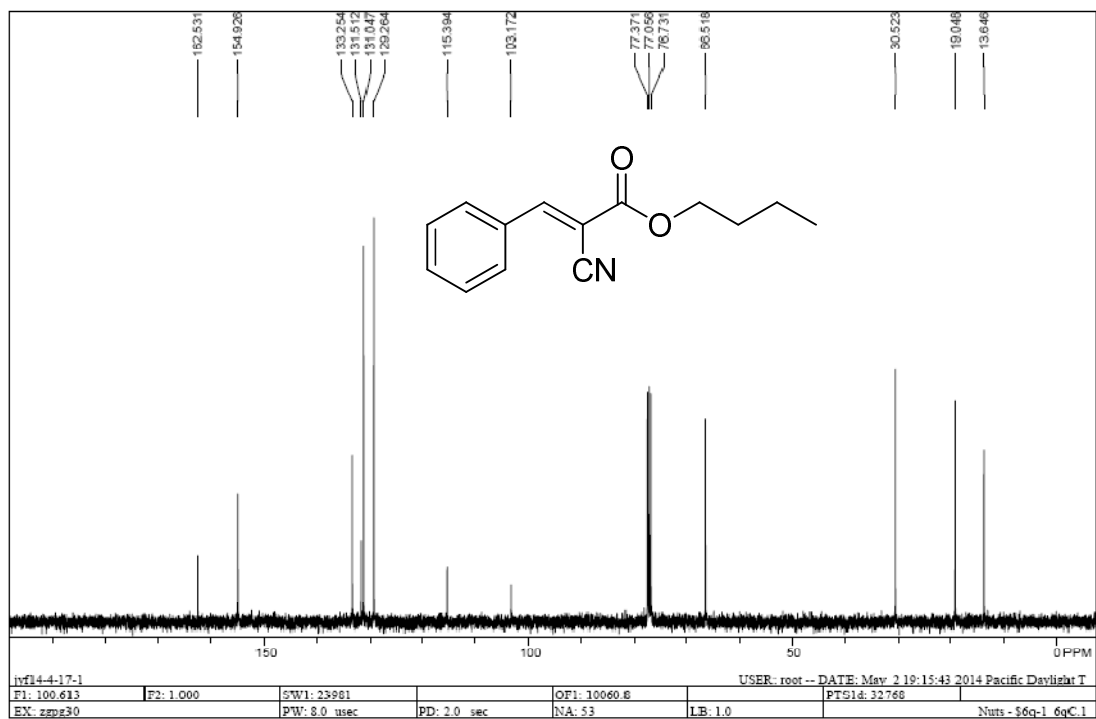

$^1\text{H}$  and  $^{13}\text{C}$  NMR of **6r**

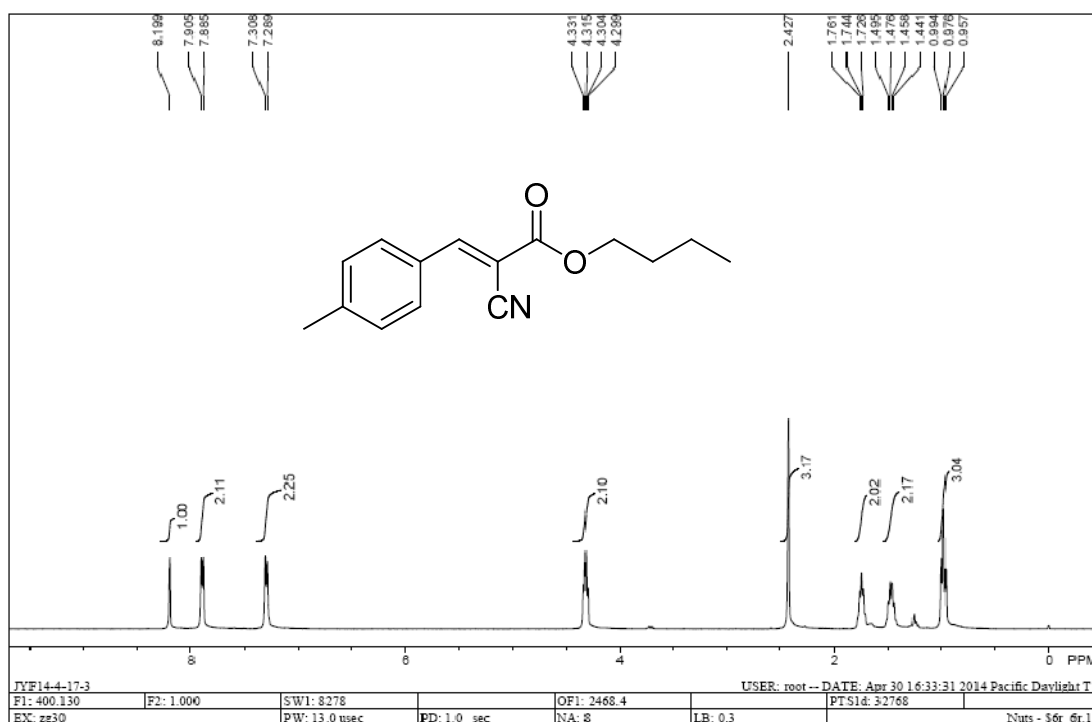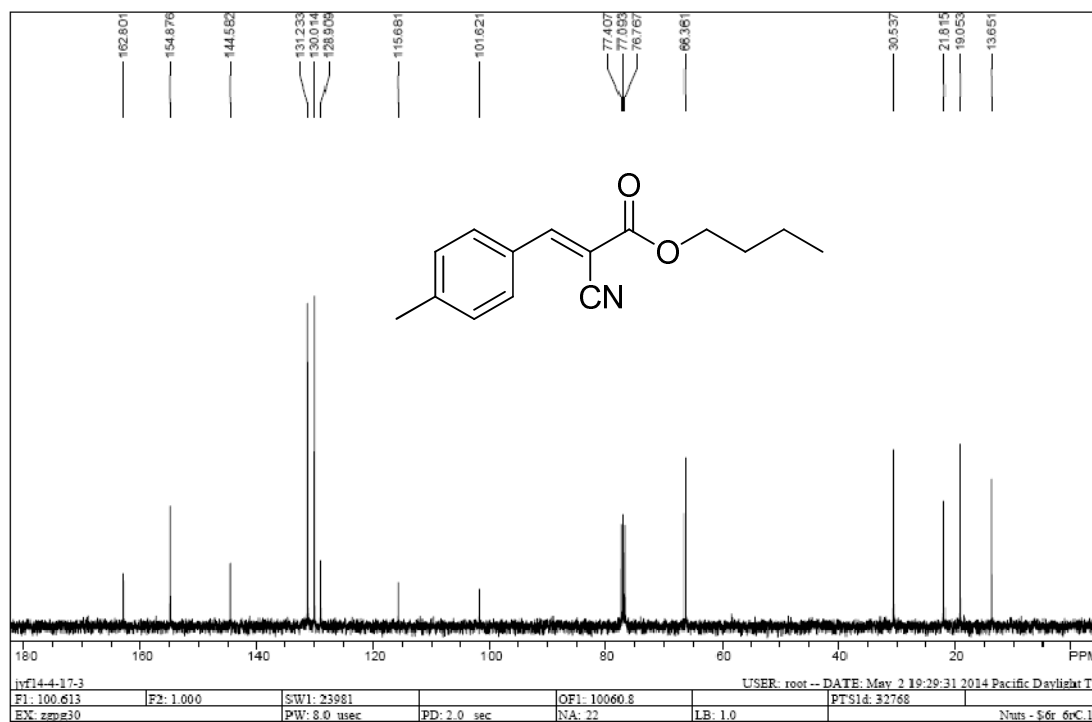

$^1\text{H}$  and  $^{13}\text{C}$  NMR of **6s**

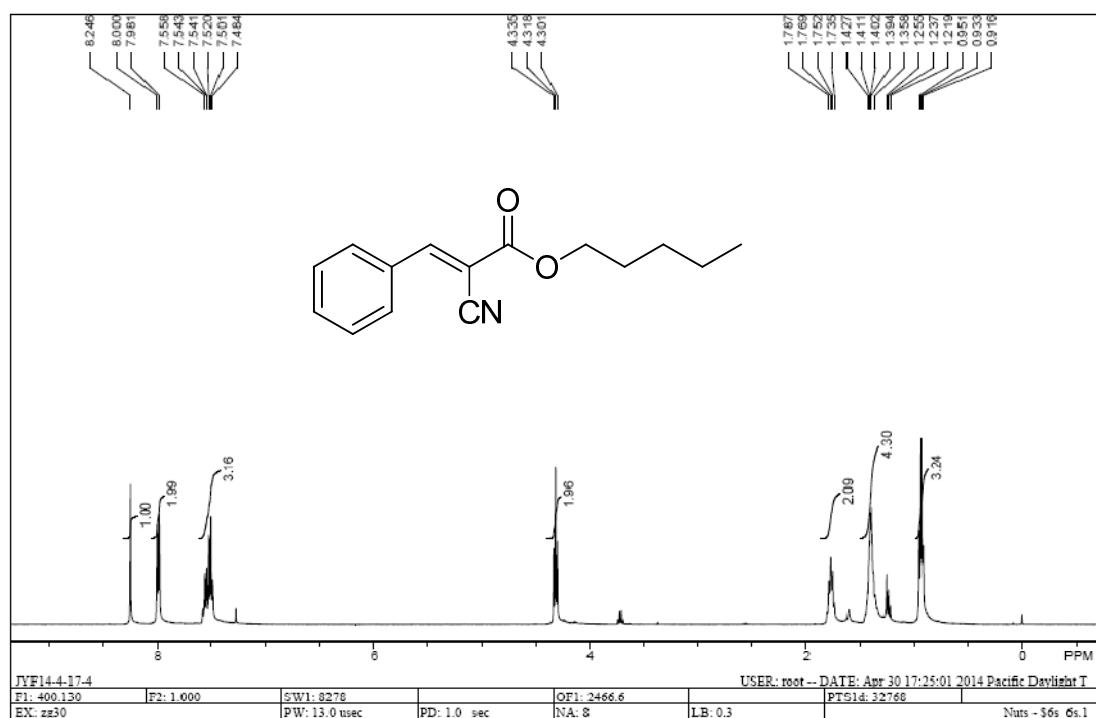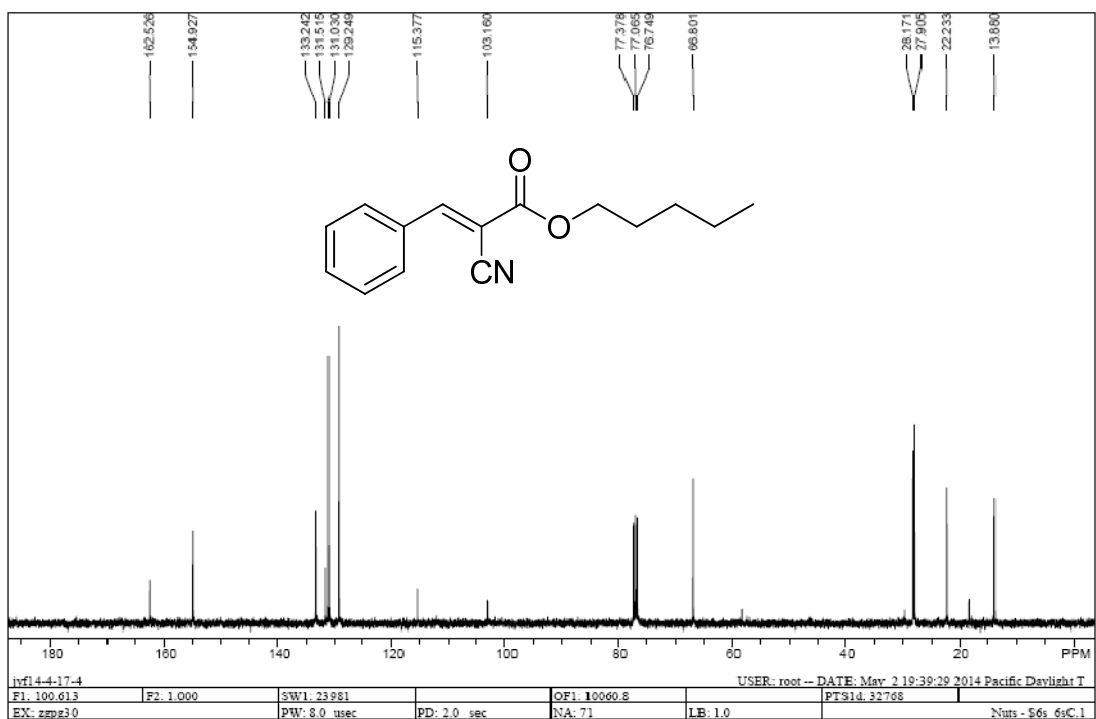

$^1\text{H}$  and  $^{13}\text{C}$  NMR of **6t**

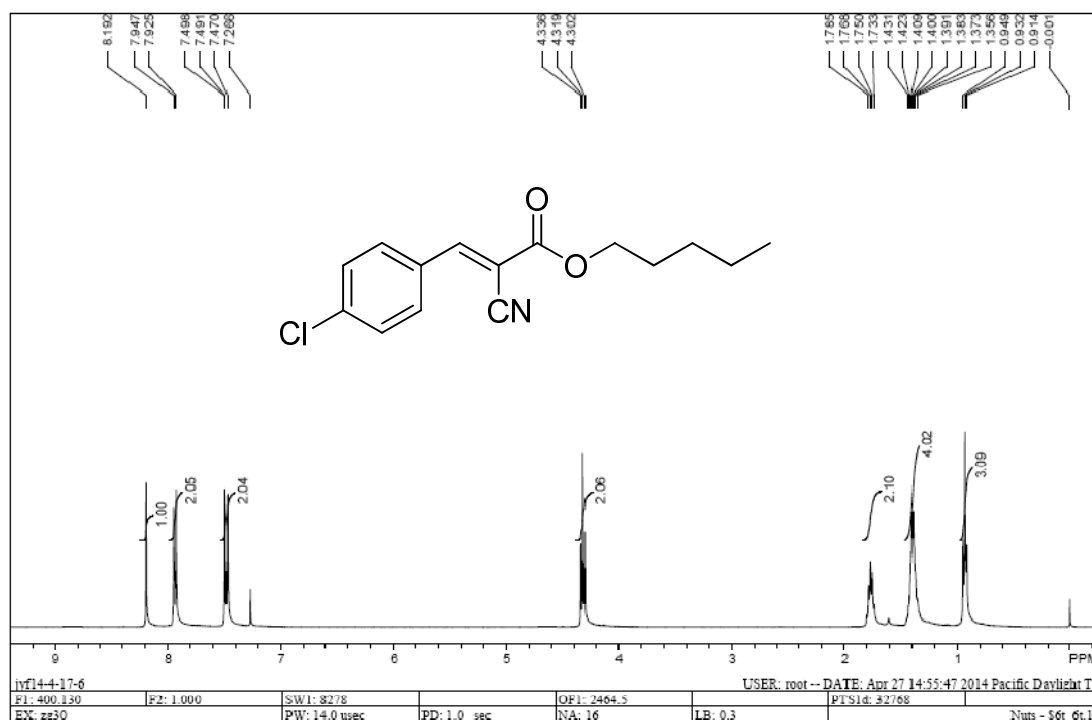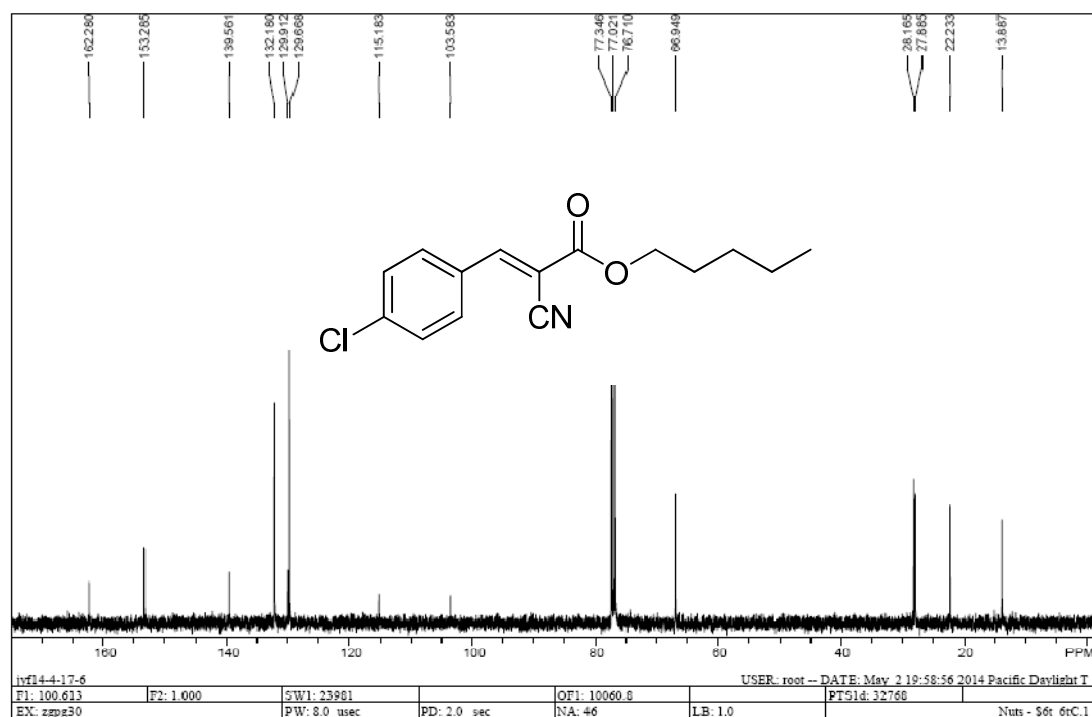

$^1\text{H}$  and  $^{13}\text{C}$  NMR of **6u**

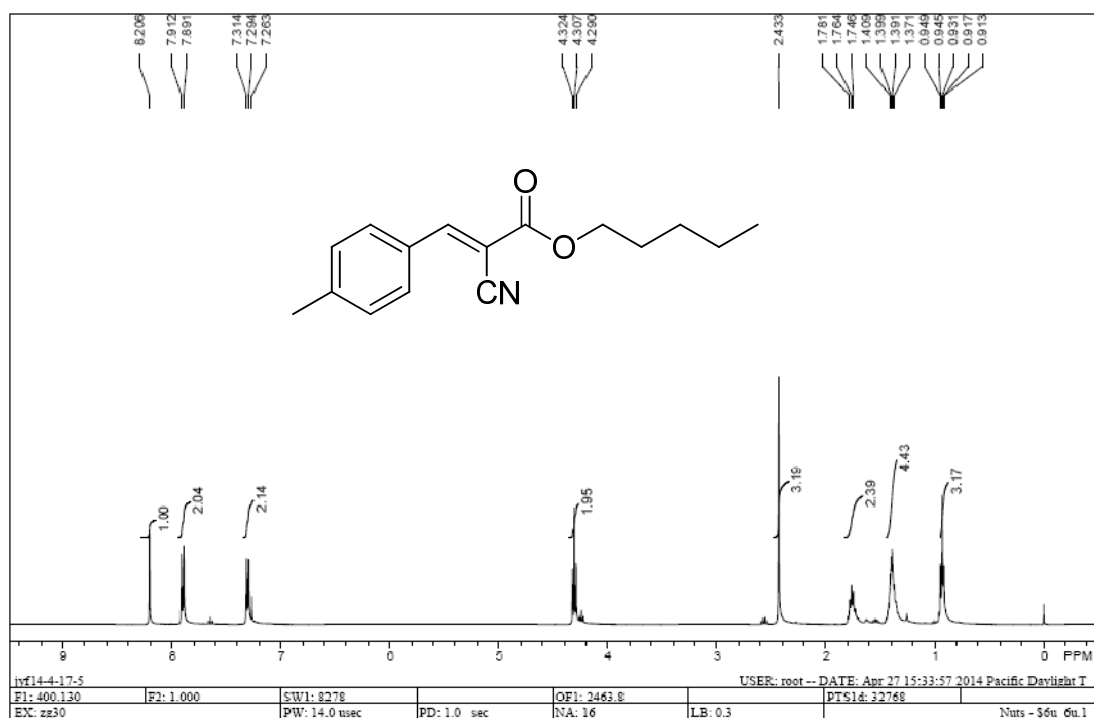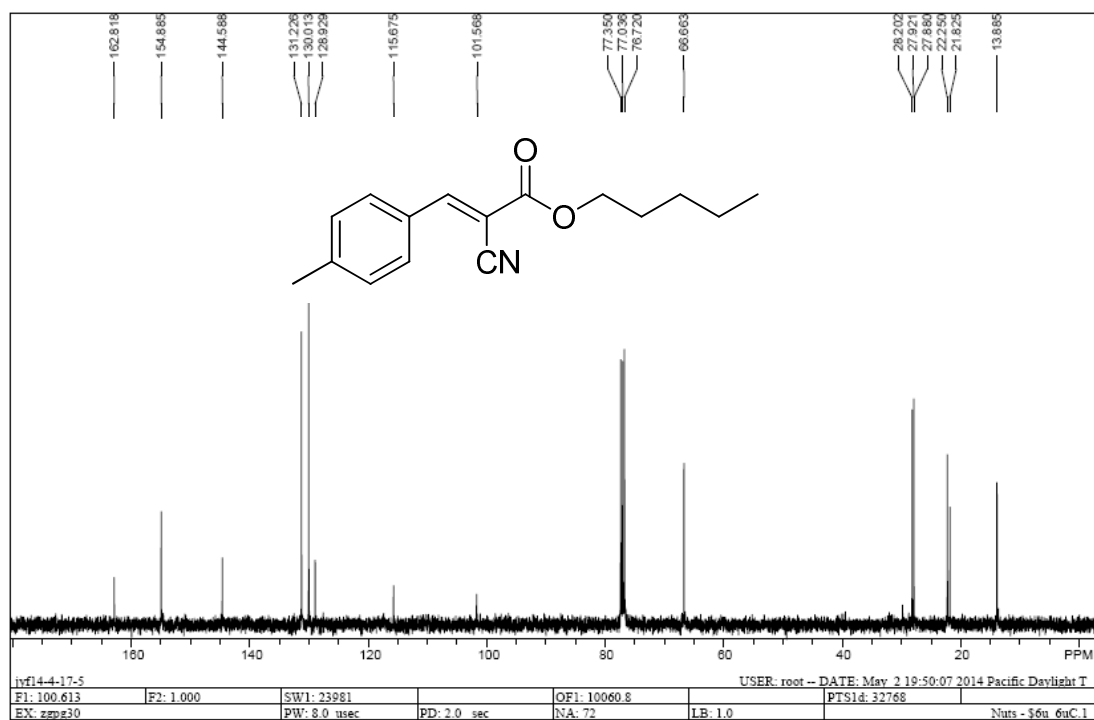

$^1\text{H}$  and  $^{13}\text{C}$  NMR of **6v**

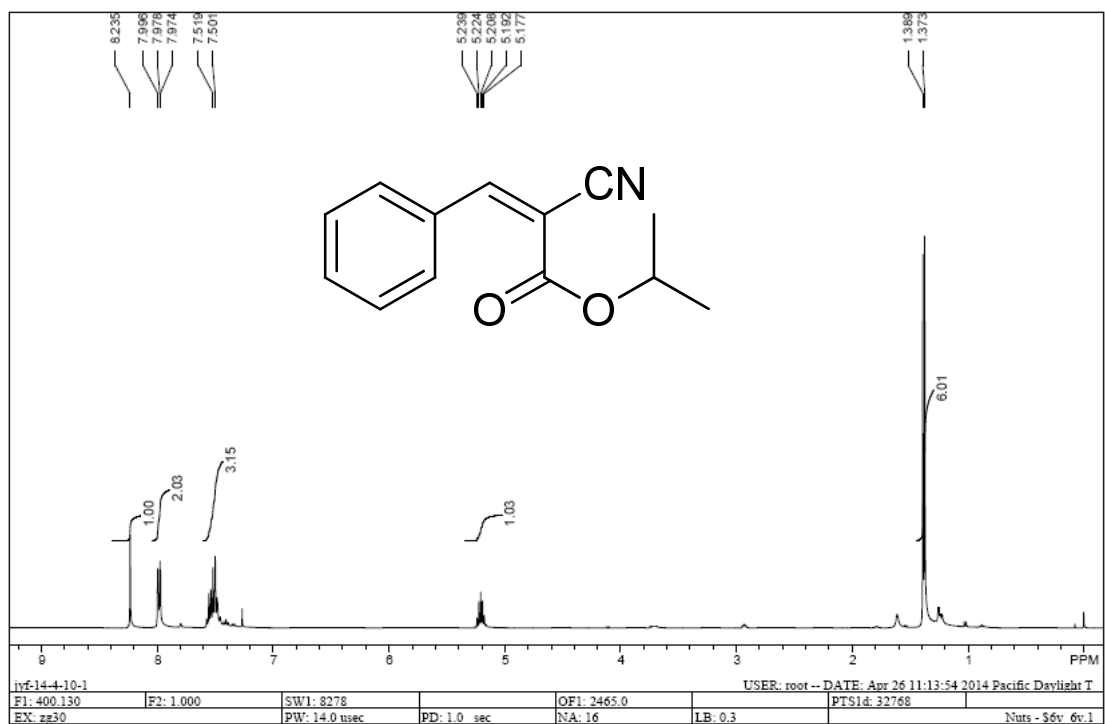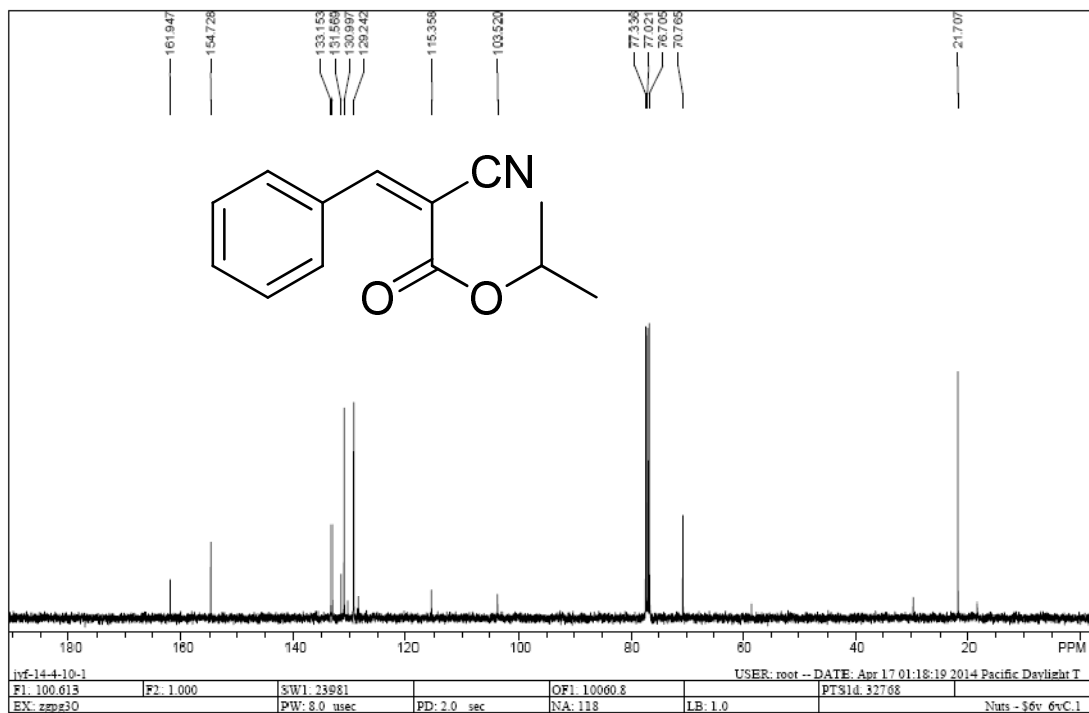

$^1\text{H}$  and  $^{13}\text{C}$  NMR of **6w**

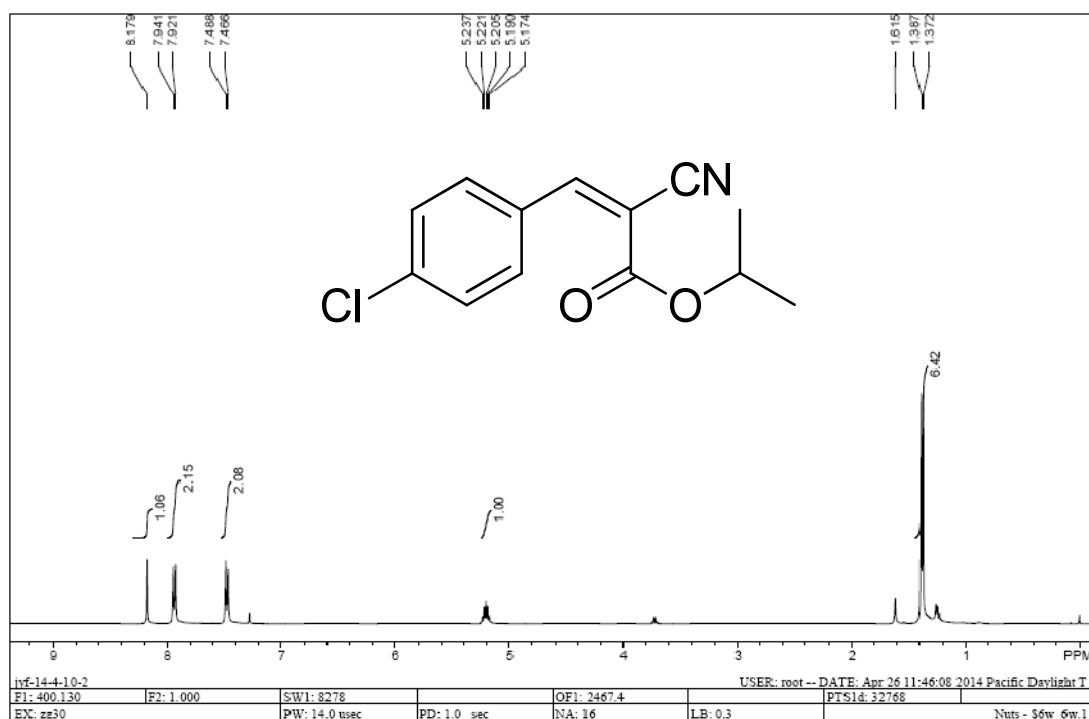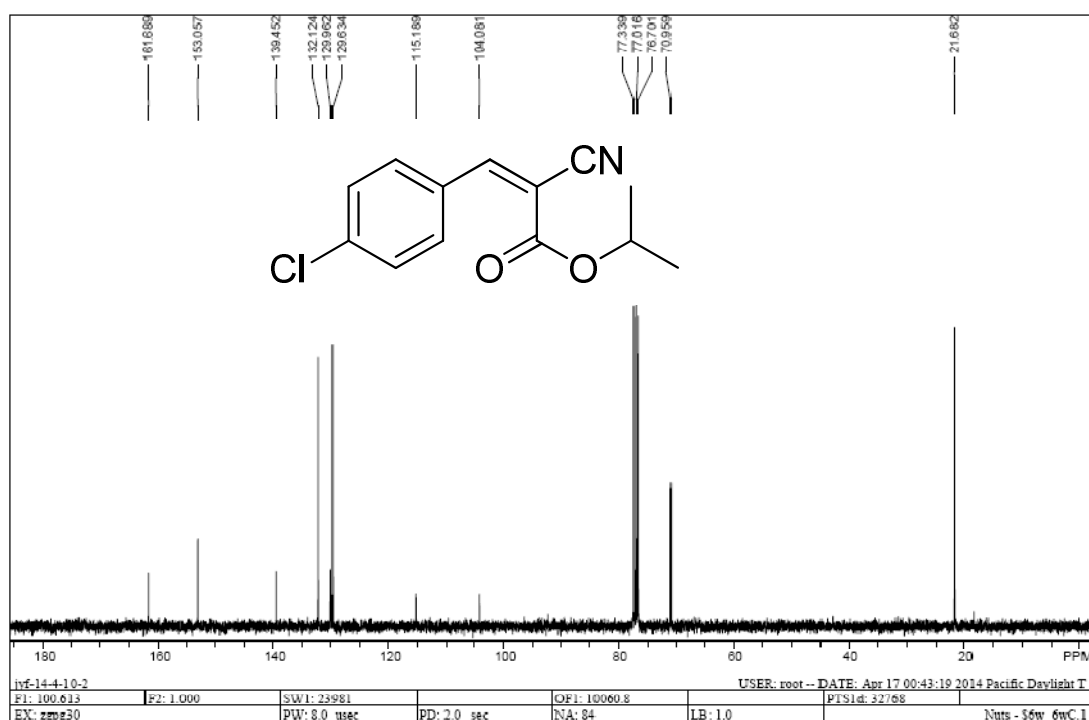



$^1\text{H}$  and  $^{13}\text{C}$  NMR of **6x**

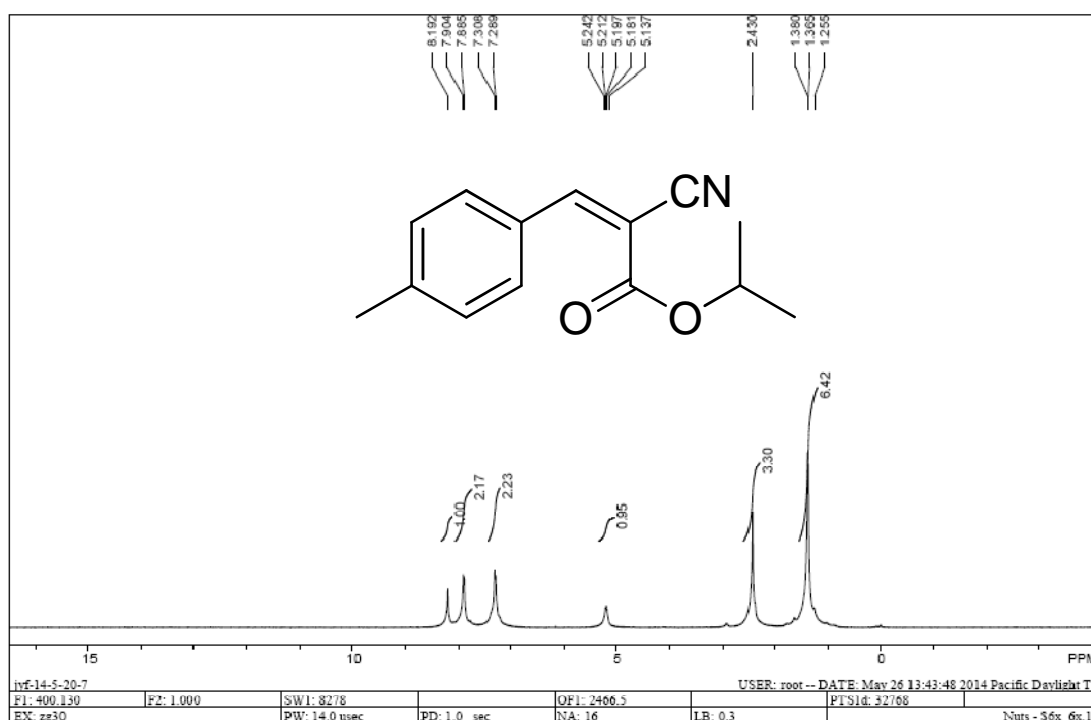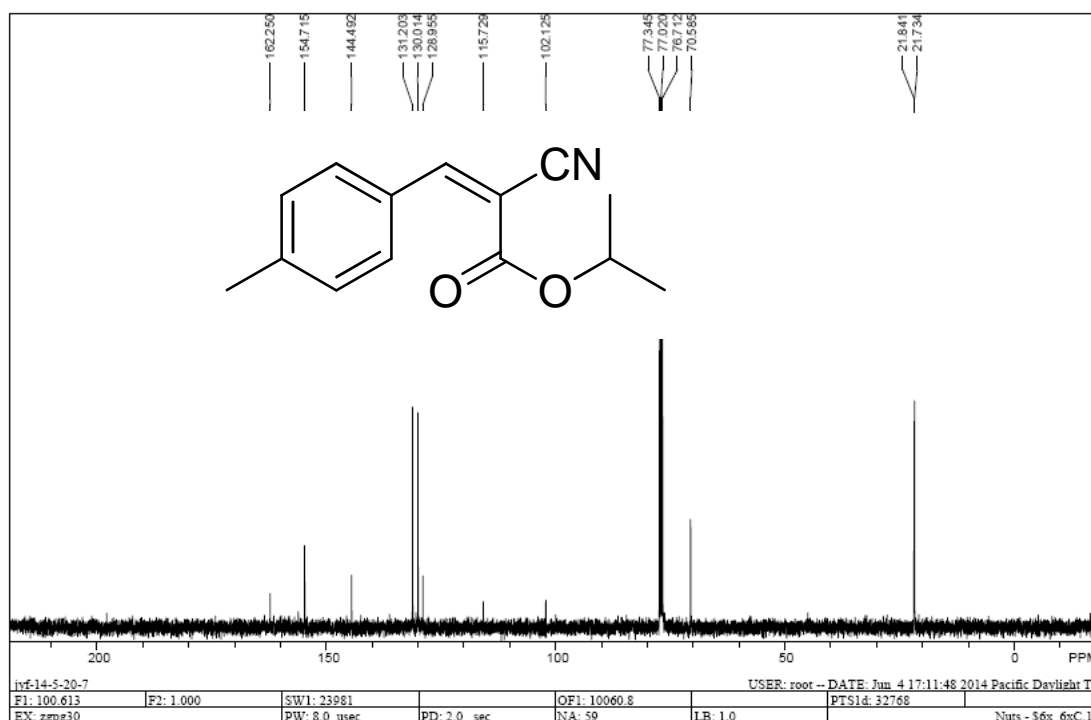

$^1\text{H}$  and  $^{13}\text{C}$  NMR of **6y**

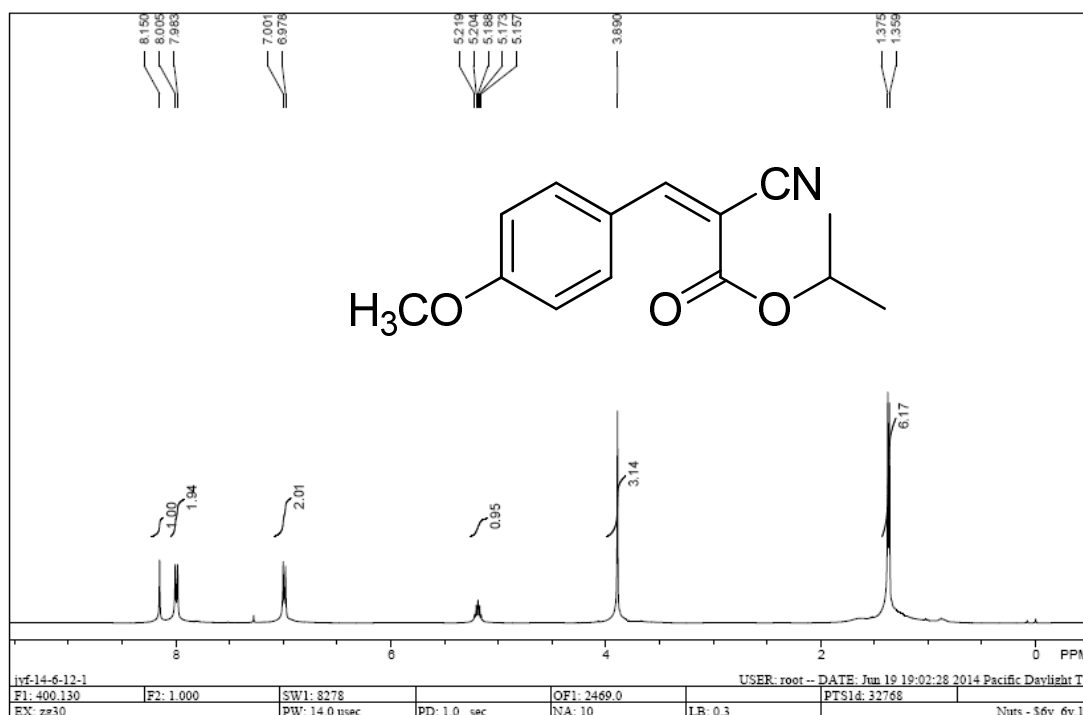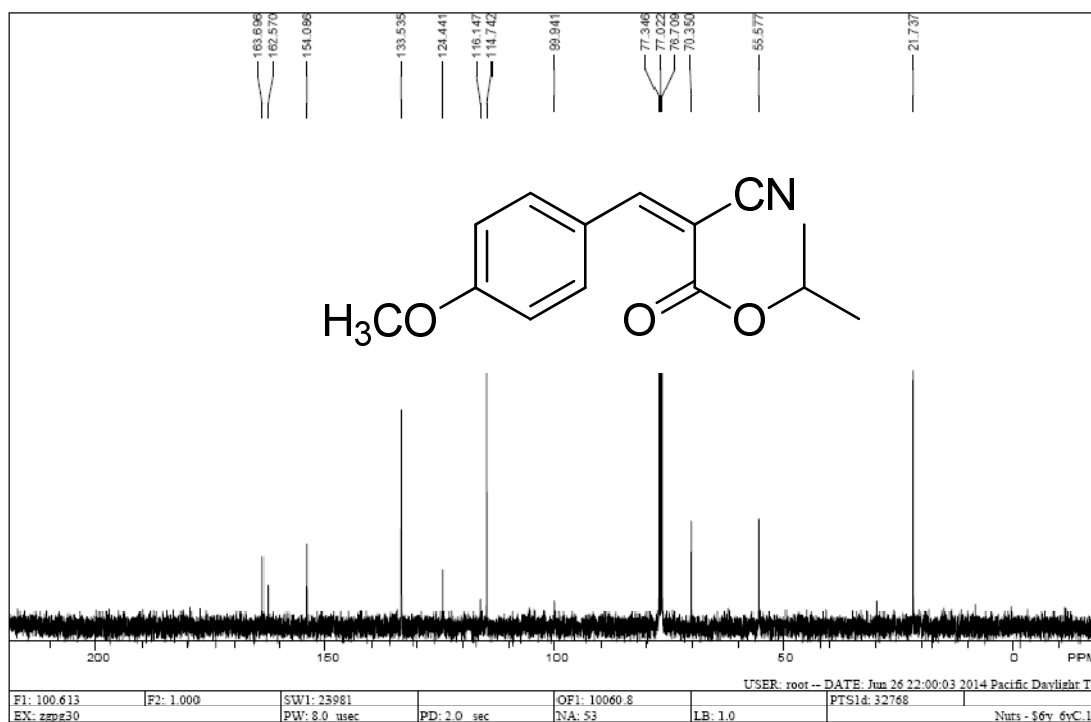

$^1\text{H}$  and  $^{13}\text{C}$  NMR of **6z**

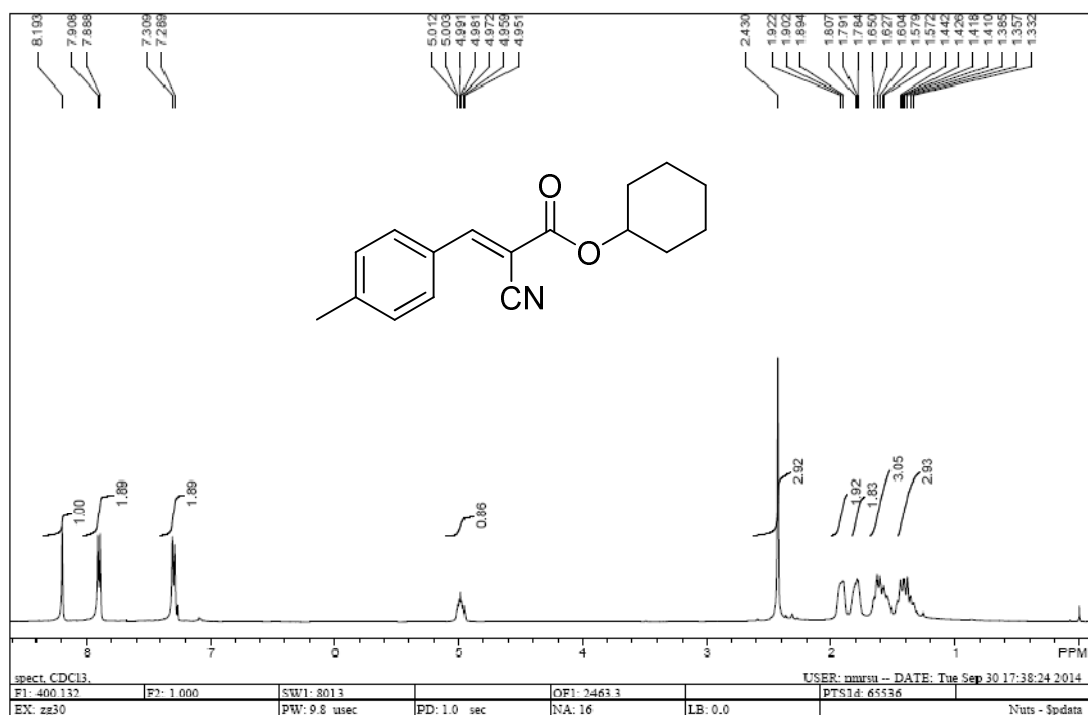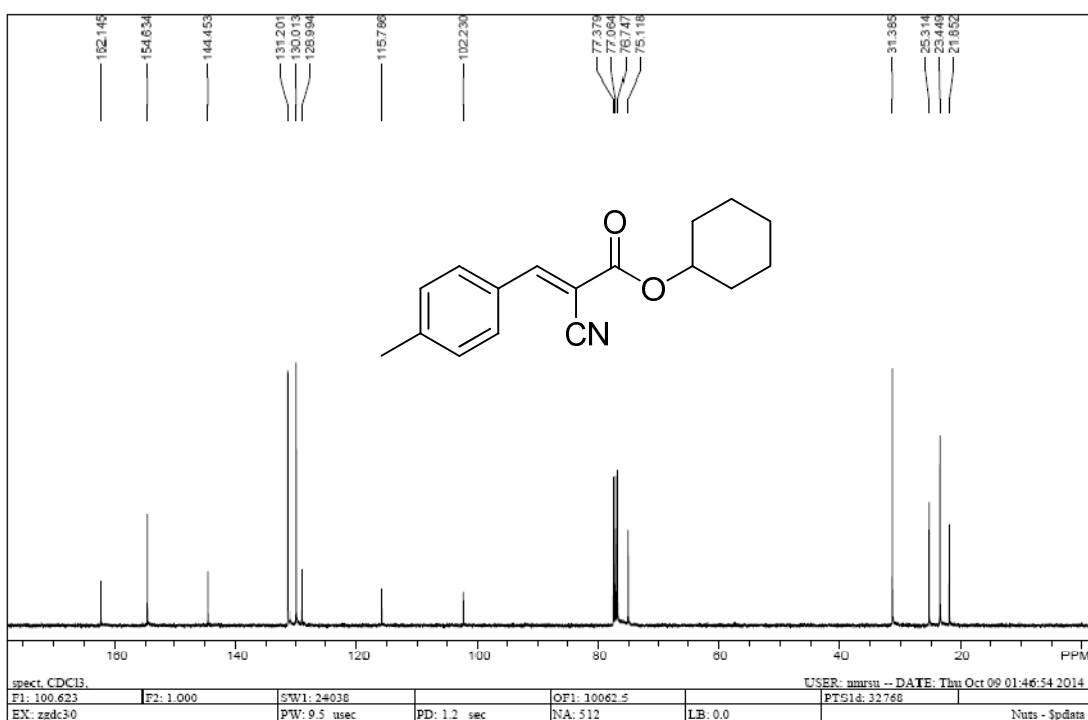

$^1\text{H}$  and  $^{13}\text{C}$  NMR of **6aa**

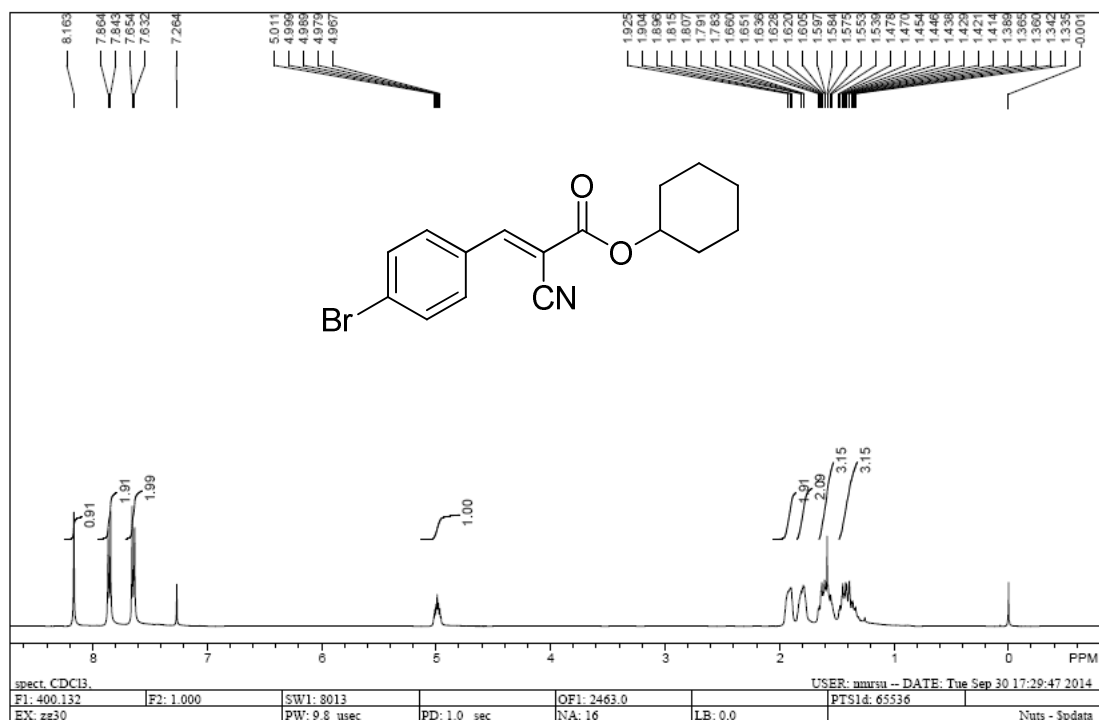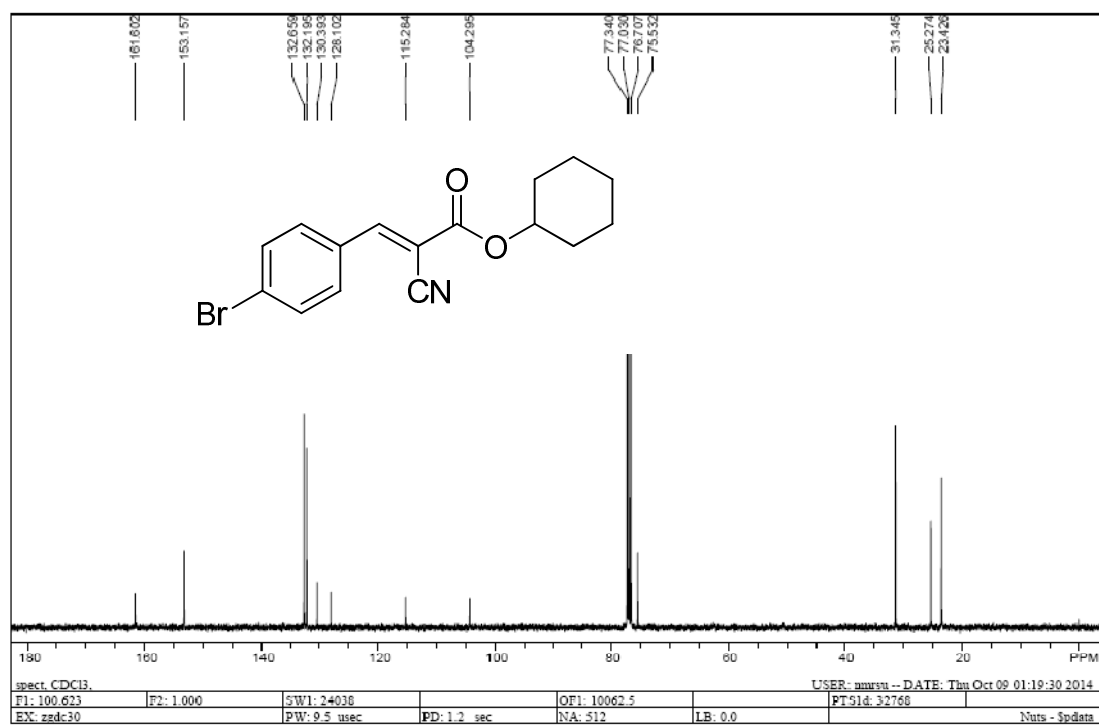

$^1\text{H}$  and  $^{13}\text{C}$  NMR of 7

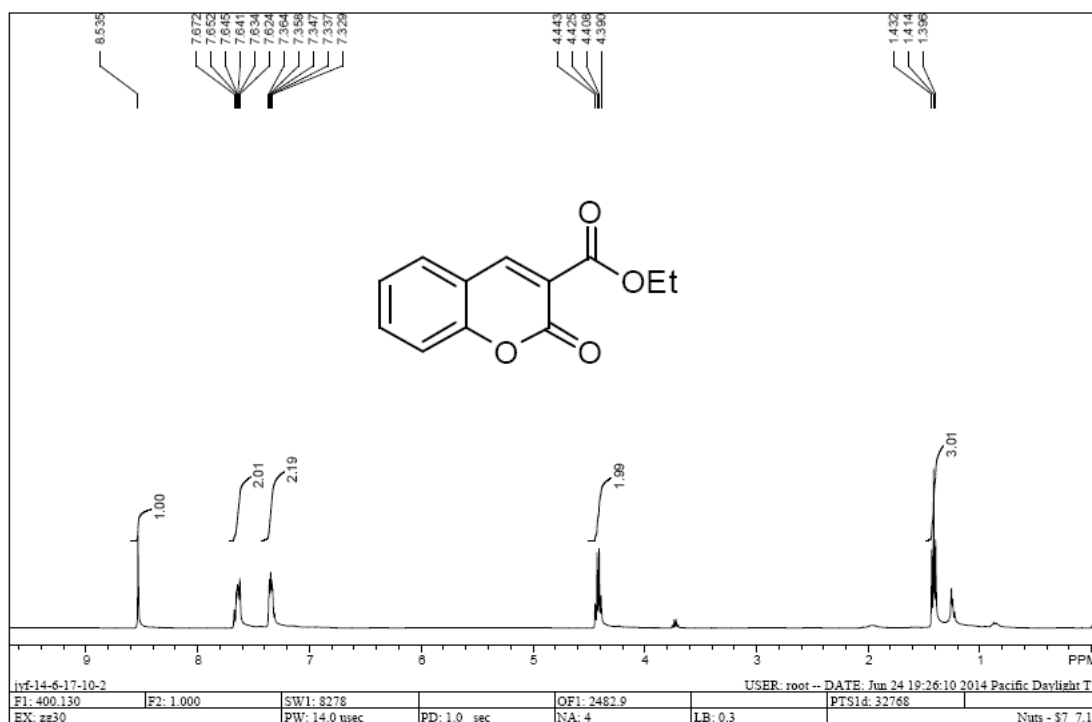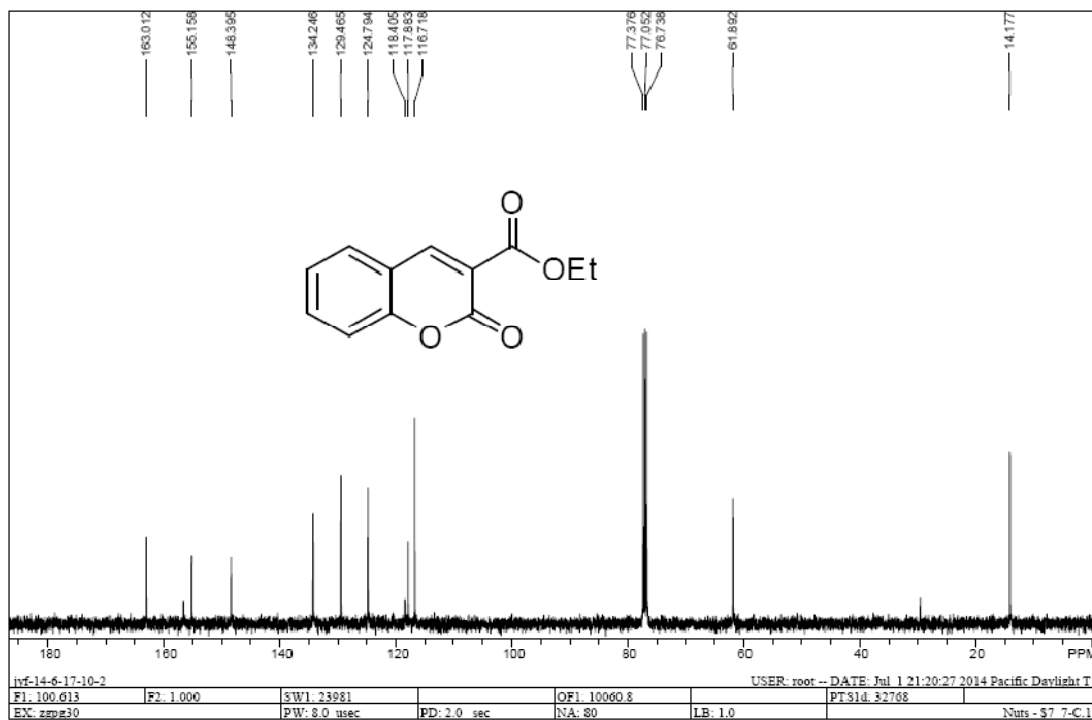

Supplement: c4ra13826k1.pdf [file c4ra13826k1.pdf]
